# Supplementary material for: Macrocycle- and metal-centered reduction of metal tetraphenylporphyrins where the metal is copper(ii), nickel(ii) and iron(ii)
Source: Royal Society of Chemistry journal article supplement (doi:10.1039/d1dt02573b), 2021-01-01
Supplement: d1dt02573b1.pdf [file d1dt02573b1.pdf]

### Supporting information

**Table S1.** IR spectra of pristine porphyrins and salts **1 - 4**.

| Components                                               | Cryptand                                                                                                                                                                           | Bu <sub>3</sub> Me<br>PI                                                                                                                        | Cu <sup>II</sup><br>(TPP <sup>2-</sup> )                                                                                                                                                          | {Crypt(Cs <sup>+</sup> ) <sub>2</sub><br>{Cu <sup>II</sup> (TPP <sup>+</sup> ) <sup>2-</sup> }                                                                                                 | Ni <sup>II</sup><br>(TPP <sup>2-</sup> )                                                                                                                                                                    | {Crypt(Cs <sup>+</sup> )<br>{Ni(TPP)} <sup>-</sup><br>·C <sub>6</sub> H <sub>5</sub> CH <sub>3</sub>                                                                                                        | {Bu <sub>3</sub> MeP <sup>+</sup><br>{Ni(TPP)} <sup>-</sup><br>·C <sub>6</sub> H <sub>5</sub> CH <sub>3</sub>                                                                                         | Fe <sup>II</sup><br>(TPP <sup>2-</sup> )                                                                                                                 | {Bu <sub>3</sub> MeP <sup>+</sup><br>{Fe <sup>I</sup> (TPP <sup>2-</sup> ) <sup>-</sup><br>·C <sub>6</sub> H <sub>5</sub> CH <sub>3</sub>              |
|----------------------------------------------------------|------------------------------------------------------------------------------------------------------------------------------------------------------------------------------------|-------------------------------------------------------------------------------------------------------------------------------------------------|---------------------------------------------------------------------------------------------------------------------------------------------------------------------------------------------------|------------------------------------------------------------------------------------------------------------------------------------------------------------------------------------------------|-------------------------------------------------------------------------------------------------------------------------------------------------------------------------------------------------------------|-------------------------------------------------------------------------------------------------------------------------------------------------------------------------------------------------------------|-------------------------------------------------------------------------------------------------------------------------------------------------------------------------------------------------------|----------------------------------------------------------------------------------------------------------------------------------------------------------|--------------------------------------------------------------------------------------------------------------------------------------------------------|
|                                                          |                                                                                                                                                                                    |                                                                                                                                                 |                                                                                                                                                                                                   | ( <b>1</b> )                                                                                                                                                                                   |                                                                                                                                                                                                             | ( <b>2</b> )                                                                                                                                                                                                | ( <b>3</b> )                                                                                                                                                                                          |                                                                                                                                                          | ( <b>4</b> )                                                                                                                                           |
| M <sup>II</sup> TPP                                      |                                                                                                                                                                                    |                                                                                                                                                 | 444w<br>524w<br>656m<br>696s<br>711m<br>728m<br>742s<br>793s<br>833w<br>898w<br>995m<br>1005vs<br>1070s<br>1177w<br>1310w<br>1347s<br>1369w<br>1440m<br>1490w<br>1534w<br>1600w<br>3022w<br>3051w | 444w<br>527w*<br>656w<br>700s<br>-<br>731m*<br>752s<br>768m<br>834w<br>872w<br>989m<br>1004m<br>1056s 1066s*<br>1186m<br>1296m*<br>1355vs*<br>-<br>1440m*<br>1488m*<br>1591m<br>3021w<br>3047w | 444w<br>525w<br>560w<br>663w<br>696s<br>708m<br>723w<br>741s<br>791s<br>834w<br>1005vs<br>1023w<br>1075m<br>1176w<br>1201w<br>1247w<br>1352s<br>1437m<br>1460w<br>1490w<br>1533w<br>1599m<br>3021w<br>3057w | 444w<br>528w*<br>557w<br>666w<br>702s<br>715m<br>733m*<br>752s<br>787m<br>833w<br>983s*<br>-<br>1069s*<br>1176w<br>1201w<br>1249w<br>1344s<br>1439m*<br>1460w<br>1490w*<br>1528m<br>1596m<br>3023w<br>3053w | -<br>-<br>565w<br>-<br>702s<br>712m*<br>731m<br>752m<br>781m<br>843w<br>1005m<br>1017m<br>1060s*<br>1175w<br>1201w<br>1240w*<br>1338s<br>1436m<br>1454s<br>1488m*<br>1530w<br>1595w<br>3022w<br>3054w | 433w<br>523w<br>660w<br>700s<br>719m<br>750s<br>803s<br>1000vs<br>1068m<br>1171m<br>1201w<br>1335m<br>1441m<br>1485w<br>1517w<br>1595m<br>3016w<br>3052w | 420w<br>523w<br>662w<br>700s<br>714m*<br>750s<br>820m*<br>989s<br>1068m<br>1175w<br>1198w*<br>1356s<br>1439s<br>1494w*<br>-<br>1597m<br>3020w<br>3052w |
| Cation <sup>+</sup>                                      | Crypt(Cs <sup>+</sup> )                                                                                                                                                            |                                                                                                                                                 |                                                                                                                                                                                                   | Crypt(Cs <sup>+</sup> )                                                                                                                                                                        |                                                                                                                                                                                                             | Crypt(Cs <sup>+</sup> )                                                                                                                                                                                     | Bu <sub>3</sub> MeP <sup>+</sup>                                                                                                                                                                      |                                                                                                                                                          | Bu <sub>3</sub> MeP <sup>+</sup>                                                                                                                       |
|                                                          | 476w<br>528w<br>581w<br>735m<br>922m<br>948w<br>982m<br>1038w<br>1071m<br>1100s<br>1127s<br>1213w<br>1295m<br>1329m<br>1360s<br>1446m<br>1462m<br>1490w<br>2790w<br>2877w<br>2943w | 456w<br>719w<br>767w<br>820m<br>946m<br>972m<br>1009w<br>1079w<br>1100m<br>1205w<br>1237w<br>1279w<br>1311m<br>1384m<br>1464m<br>2878s<br>2958s |                                                                                                                                                                                                   | 464w<br>527w*<br>-<br>731m*<br>914m<br>942s<br>964m<br>-<br>1066s*<br>1104vs<br>1125s<br>-<br>1296m*<br>-<br>1355vs*<br>1440m*<br>1473m<br>1488m*<br>2806m<br>2868m<br>2939m                   |                                                                                                                                                                                                             | -<br>528w*<br>-<br>733m<br>-<br>942m<br>983s*<br>-<br>1069s*<br>1106vs<br>1126m<br>-<br>1298w<br>-<br>1354s<br>1439m<br>1460w<br>1490w*<br>2807m<br>2861m<br>2941m                                          | 464w<br>712m*<br>761m<br>-<br>940w<br>-<br>1005m*<br>1060s*<br>-<br>1216w<br>1240w*<br>1294s<br>1320m<br>1381w<br>1454s*<br>2872w<br>2959w                                                            |                                                                                                                                                          | 464w<br>714m*<br>765m<br>820m*<br>944s<br>973s*<br>1002w<br>1068m<br>1099m<br>1198w*<br>1230w<br>1278w<br>1307m<br>1384m<br>1460s<br>2872w<br>2960w    |
| Solvent<br>C <sub>6</sub> H <sub>5</sub> CH <sub>3</sub> |                                                                                                                                                                                    |                                                                                                                                                 |                                                                                                                                                                                                   | 731m*<br>1020w<br>1488m*                                                                                                                                                                       |                                                                                                                                                                                                             | 733m*<br>1020w<br>1490w*                                                                                                                                                                                    | -<br>1026w<br>1488m*                                                                                                                                                                                  |                                                                                                                                                          | -<br>1020w<br>1494w*                                                                                                                                   |

Abbreviation: w: weak, m: middle, s: strong, vs: very strong.

\*: bands are overlapped.

**IR spectra of starting metal phthalocyanines and their anion-radical salts**

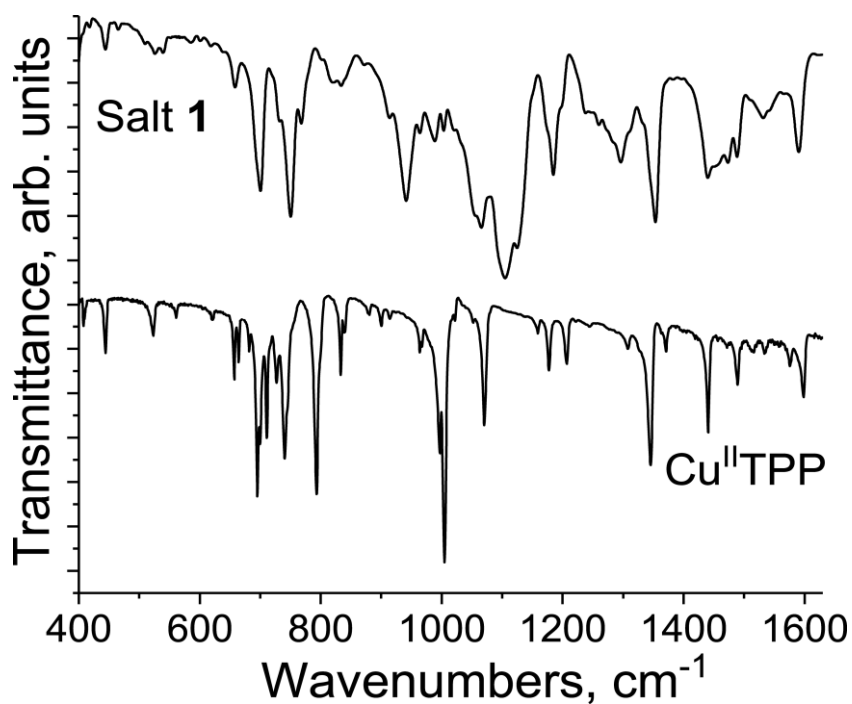

**Figure S1.** IR spectra of pristine Cu<sup>II</sup>(TPP<sup>2-</sup>) and salt {cryptand(Cs<sup>+</sup>)<sub>2</sub>{Cu<sup>II</sup>(TPP<sup>4-</sup>)<sup>2-</sup>} (1) in KBr pellets. Pellet for 1 was prepared in anaerobic conditions.

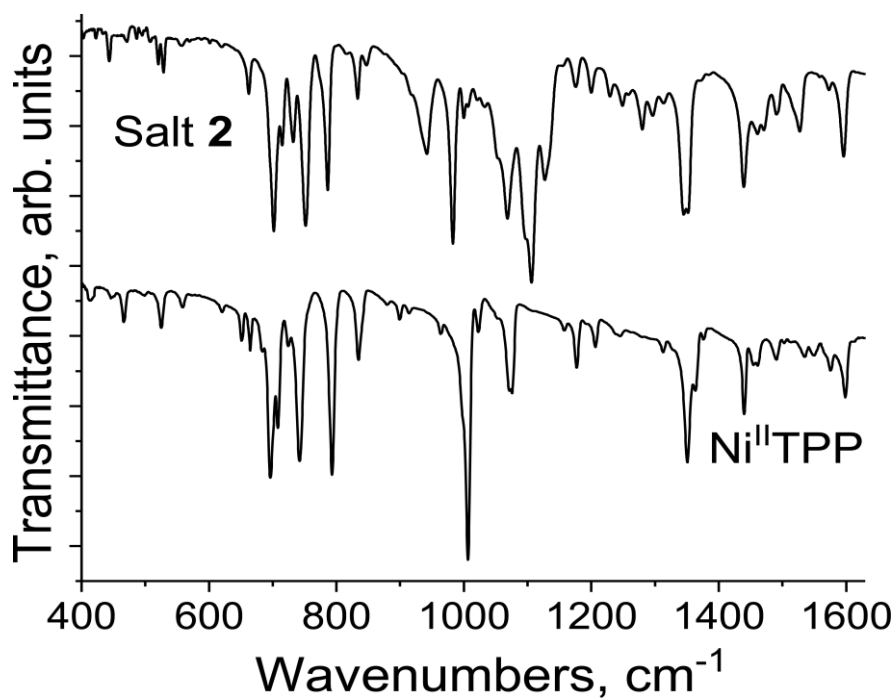

**Figure S2.** IR spectra of pristine Ni<sup>II</sup>(TPP<sup>2-</sup>) and salt {cryptand(Cs<sup>+</sup>)<sub>2</sub>{Ni(III)(TPP)}<sup>-</sup>·C<sub>6</sub>H<sub>5</sub>CH<sub>3</sub> (2) in KBr pellets. Pellet for 2 was prepared in anaerobic conditions.

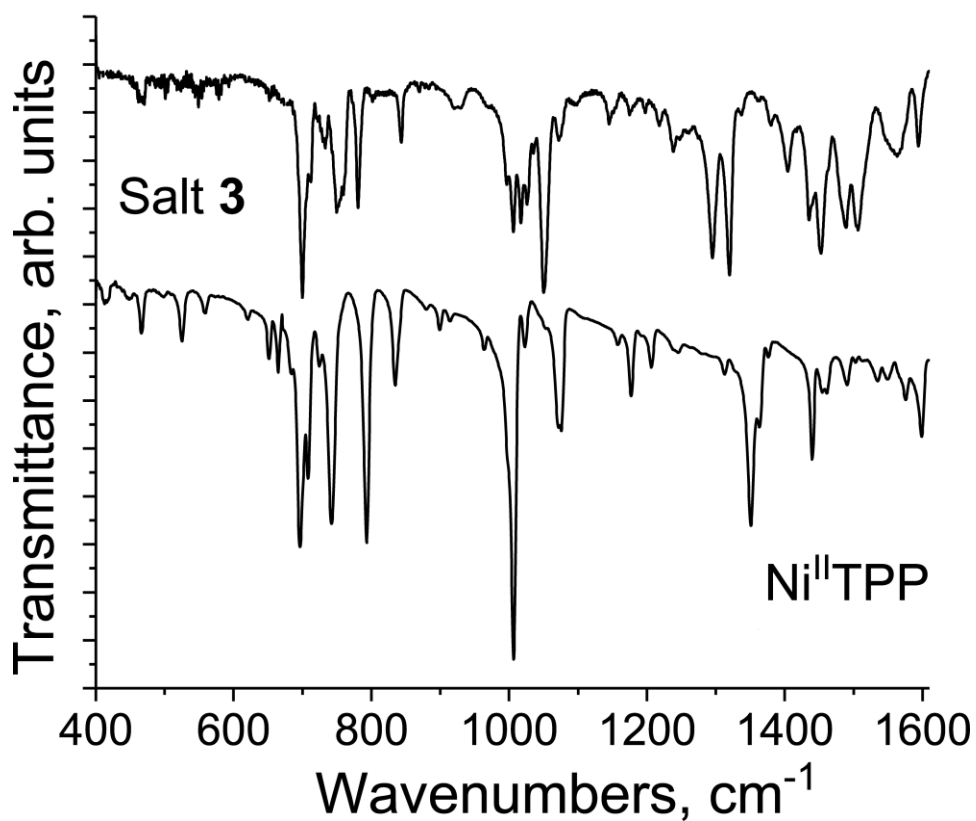

**Figure S3.** IR spectra of pristine  $\text{Ni}^{\text{II}}(\text{TPP}^{2-})$  and salt  $(\text{Bu}_3\text{MeP}^+)\{\text{Ni}(\text{TPP})\}^- \cdot \text{C}_6\text{H}_5\text{CH}_3$  (**3**) in KBr pellets. Pellet for **3** was prepared in anaerobic conditions.

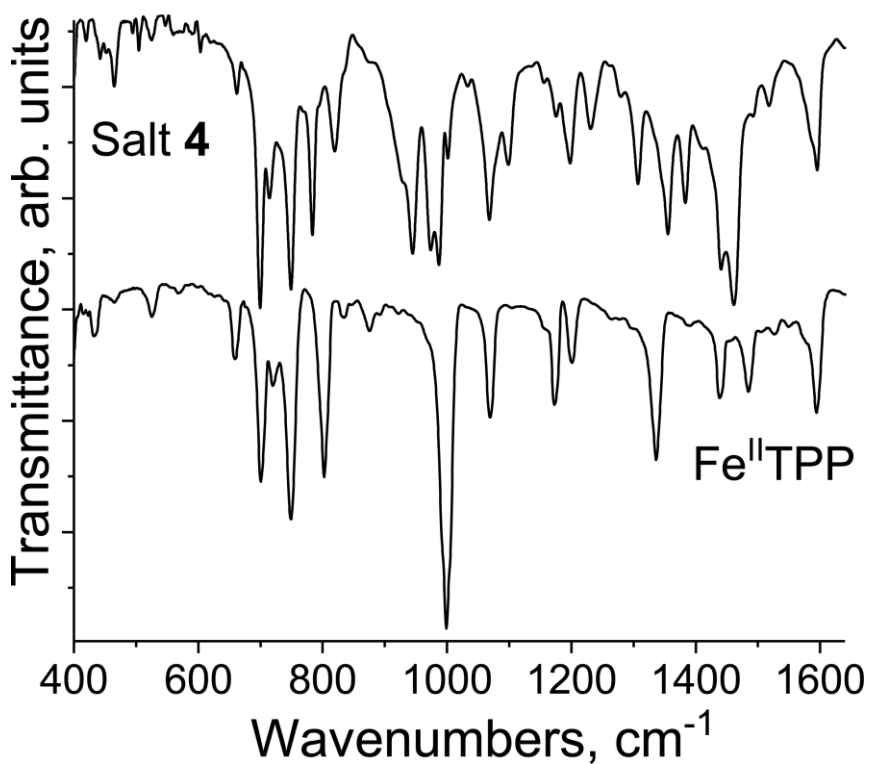

**Figure S4.** IR spectra of pristine  $\text{Fe}^{\text{II}}(\text{TPP}^{2-})$  and salt  $(\text{Bu}_3\text{MeP}^+)\{\text{Fe}^{\text{I}}(\text{TPP}^{2-})\}^- \cdot \text{C}_6\text{H}_5\text{CH}_3$  (**4**) in KBr pellets. Pellets for both compounds were prepared in anaerobic conditions.

Crystal structures of salts 1 and 2.

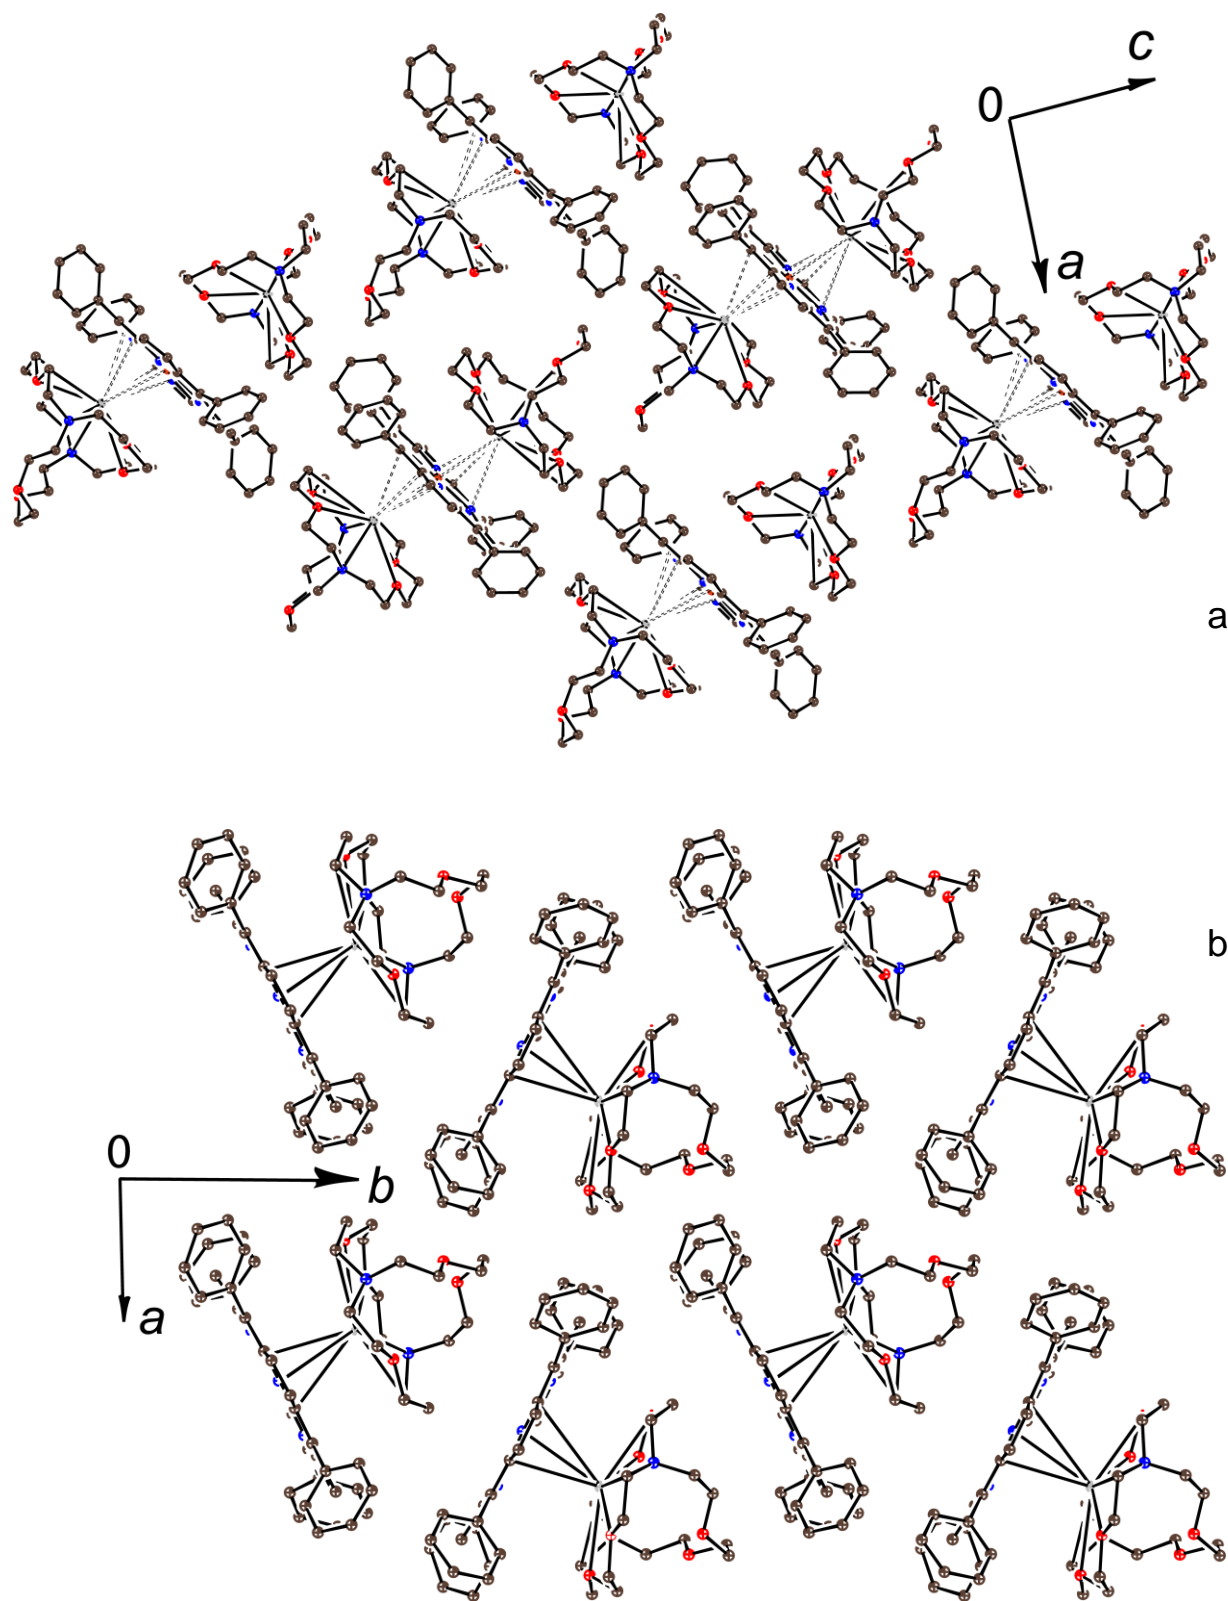

Figure S5. View on the packing of salts 1 (a) and 2 (b).

### Crystal structures of salts 3 and 4.

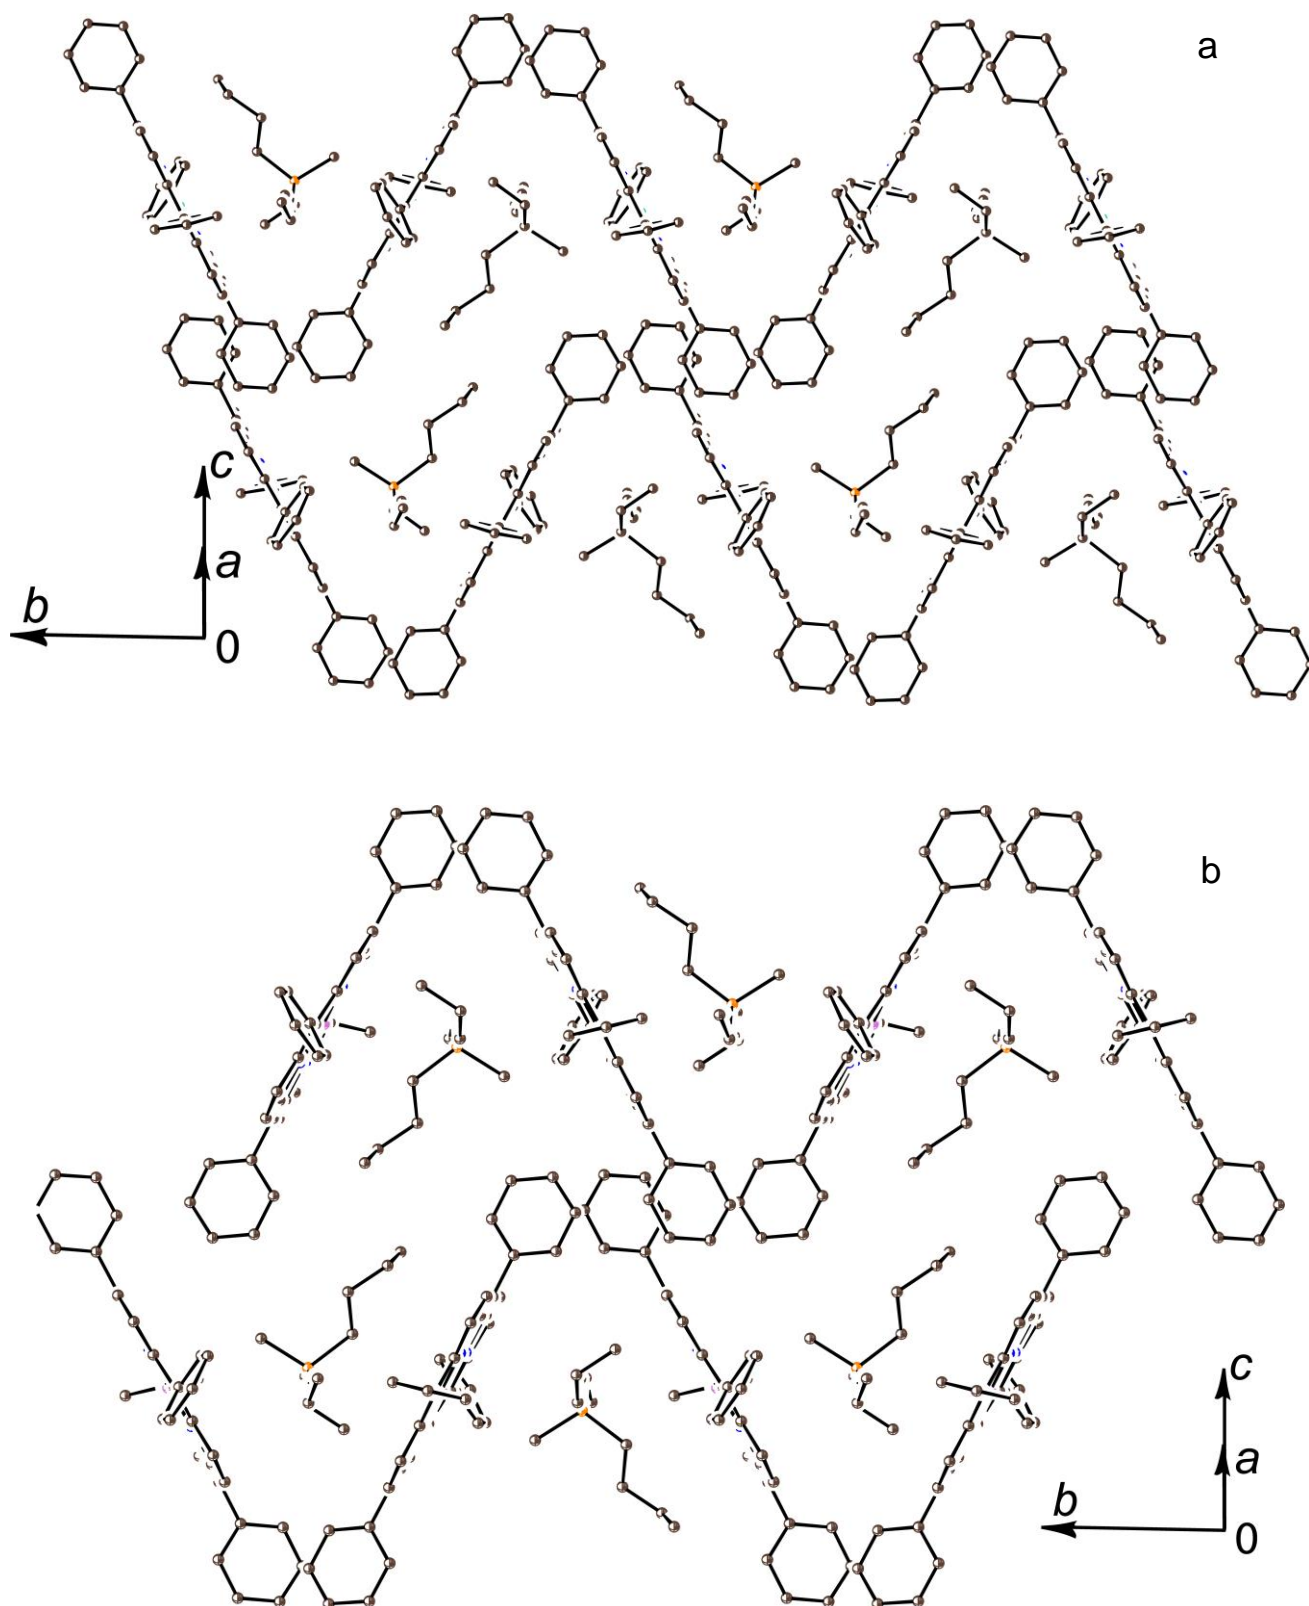

**Figure S6.** Crystal structures of salts **3** (a) and **4** (b): view on the chains of alternated {MTPP}<sup>-</sup> anions and Bu<sub>3</sub>MeP<sup>+</sup> cations approximately along the porphyrin planes. Solvent C<sub>6</sub>H<sub>5</sub>CH<sub>3</sub> molecules are not shown.

**Table S2.** Optical spectra of metalloporphyrins and their anionic salts **1 - 4**.

| Porphyrin state in salt                                       | Soret band           | Q-band             | Bands in the NIR range |
|---------------------------------------------------------------|----------------------|--------------------|------------------------|
| $\text{Cu}^{\text{II}}(\text{TPP}^{2-})^0$                    | 426                  | 546                | -                      |
| $\{\text{Cu}^{\text{II}}(\text{TPP}^{4-})\}^{2-}$ in <b>1</b> | 423, ~450 (shoulder) | 541, 615, 670      | 770, 870               |
| $\text{Ni}^{\text{II}}(\text{TPP}^{2-})^0$                    | 418                  | 532, 624           | -                      |
| $\{\text{Ni}^{\text{I}}(\text{TPP}^{2-})\}^-$ in <b>2</b>     | 285, 426             | 575, 650           | 774, 854               |
| $\{\text{Ni}^{\text{I}}(\text{TPP}^{2-})\}^-$ in <b>3</b>     | 283, 422             | 578, 648           | 772, 850               |
| $\text{Fe}^{\text{II}}(\text{TPP}^{2-})^0$                    | 424                  | 501, 566, 617, 678 | -                      |
| $\{\text{Fe}^{\text{I}}(\text{TPP}^{2-})\}^-$ in <b>4</b>     | 440                  | - 574, 612, 702    | -                      |

### UV-spectrum of 3

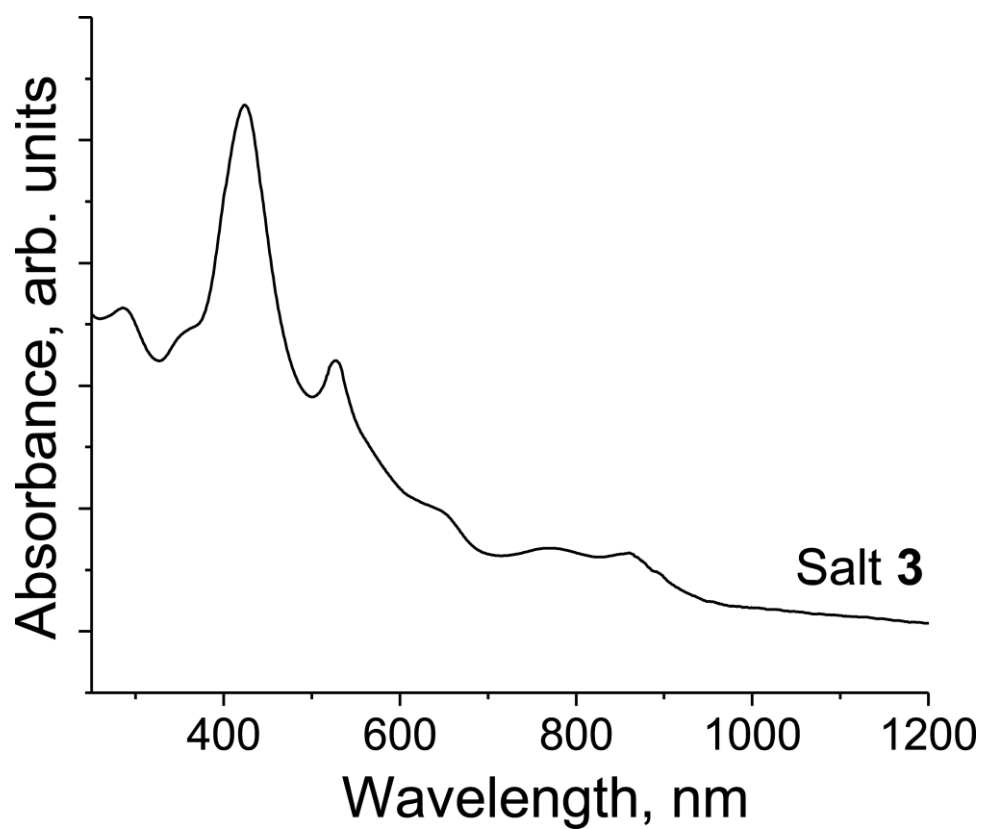

**Figure S7.** Spectrum of salt **3** in the UV-visible-NIR ranges in KBr pellets prepared in anaerobic conditions.

### Magnetic data for salt 1.

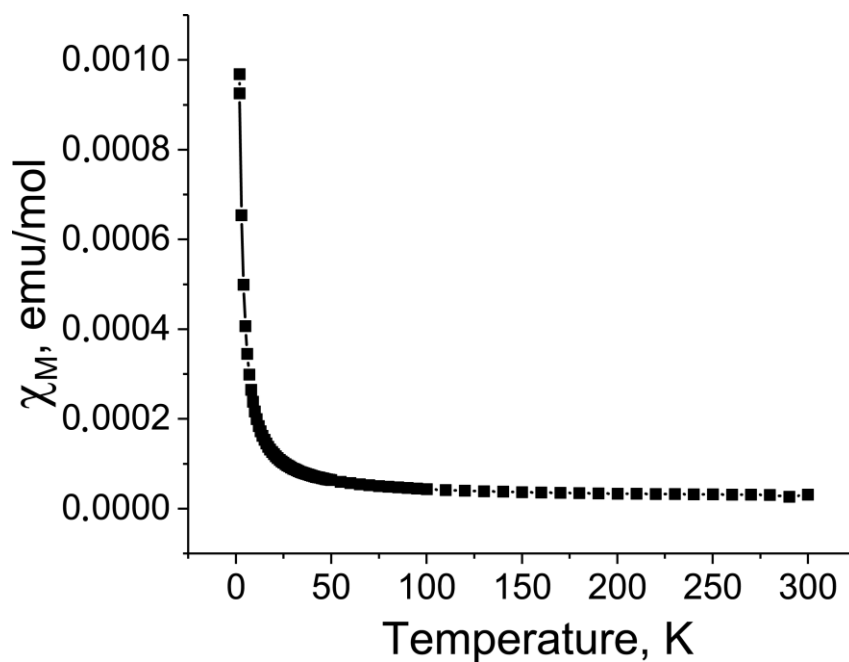

**Fig. S8.** Temperature dependence of molar magnetic susceptibility of polycrystalline **1** in the 1.9-300 R range.

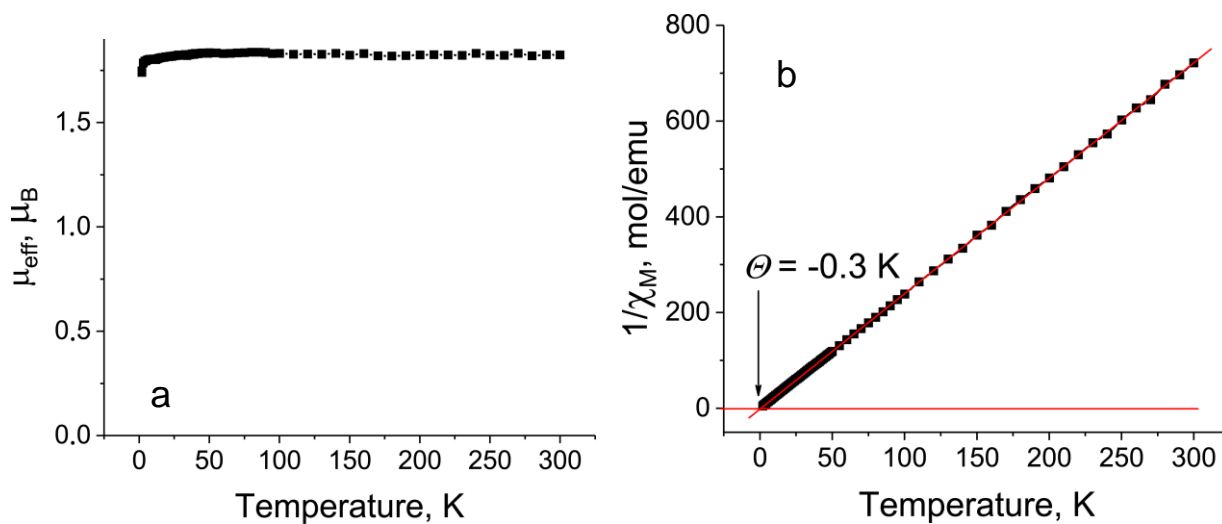

**Figure S9.** Magnetic data for polycrystalline salt **1**. Temperature dependence of : (a) effective magnetic moment and (b) reciprocal molar magnetic susceptibility in the 1.9-300 K range. Red line in Fig a show approximation of the dependence by the Curie-Weiss law with Weiss temperature of -0.3K.



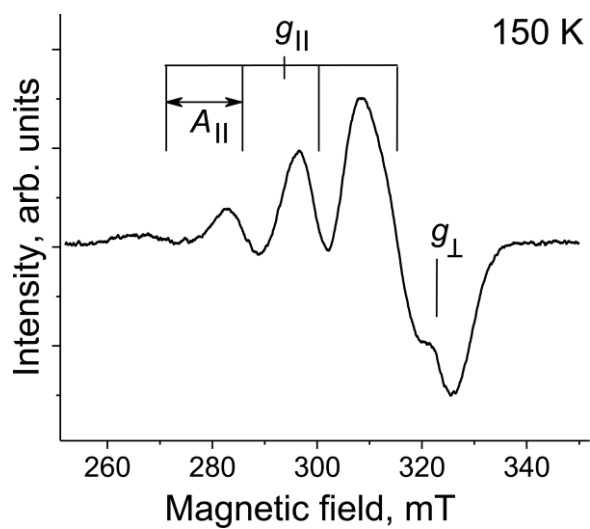

**Fig. S10.** EPR signal from polycrystalline **1** at 150 K. Determination of  $g$ -factors and  $A_{||}$  is schematically shown.

### Magnetic data for salt 2.

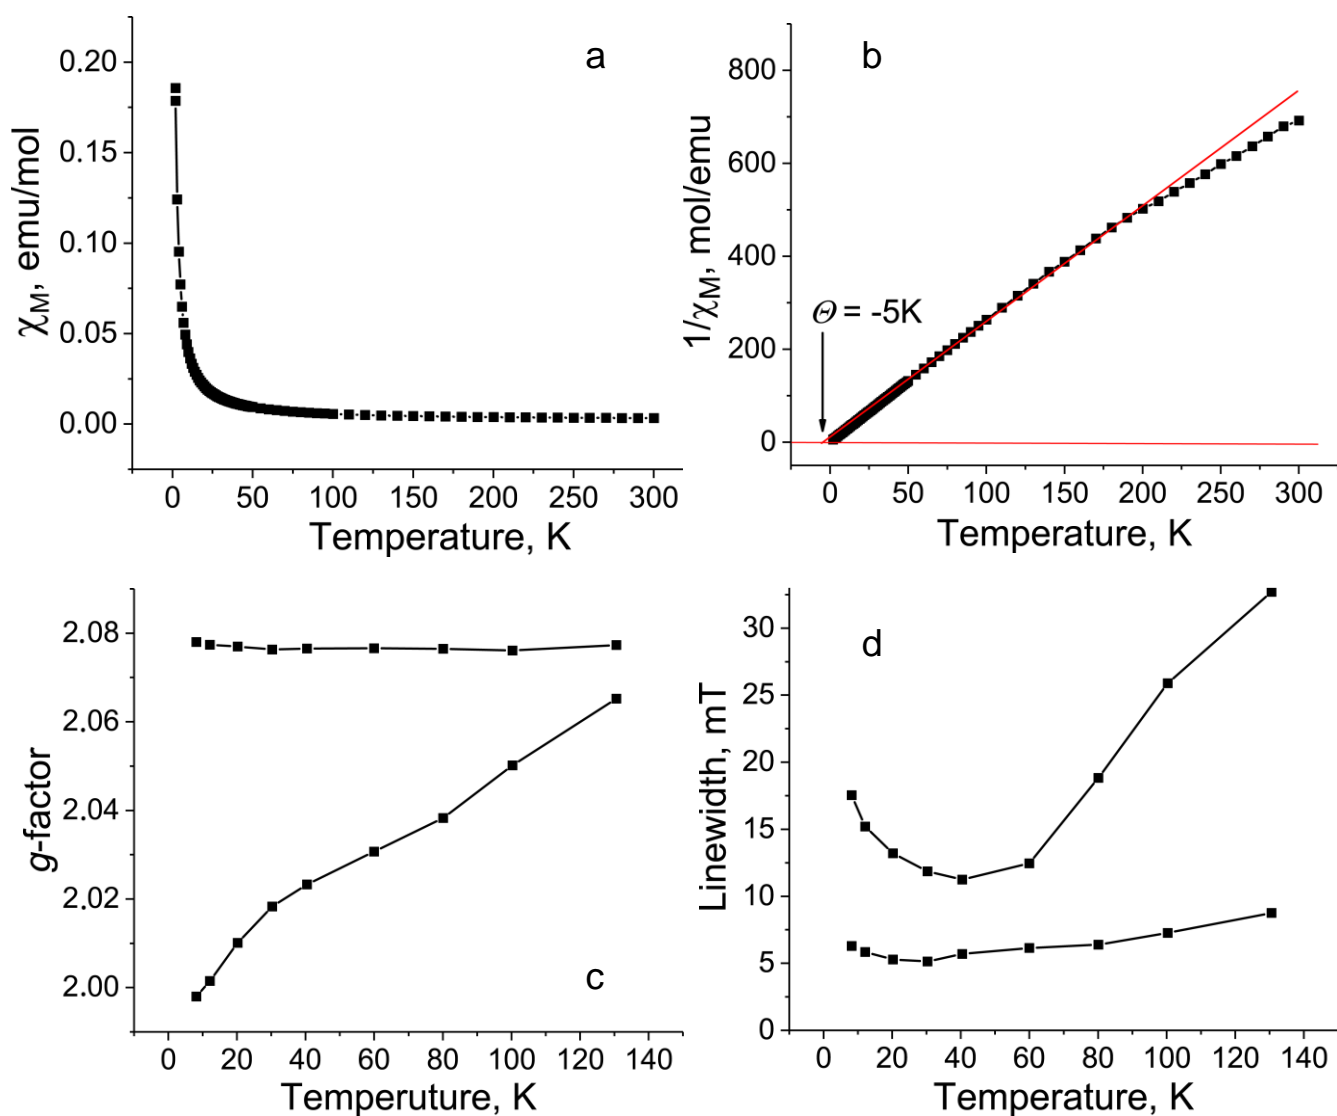

**Fig. S11.** Temperature dependences of molar magnetic susceptibility (a) and reciprocal molar magnetic susceptibility (b) of polycrystalline salt 2. Red line shows the Curie-Weiss fit for 20-150 K range. Temperature dependencies of  $g$ -factor (c) and the linewidth (d) of two broad components of the EPR signal from polycrystalline 2.

### Theoretical calculations.

DFT calculations were performed using the PBE density functional theory<sup>1</sup> with the extended basis set: Fe, Ni Cu [9s9p8d/5s5p4d], C N,O, P [5s5p2d/3s3p2d], H [5s1p/3s1p], Cs {4s,1p}/{2s,1p} for the valence electrons and the SBK pseudopotential<sup>2</sup>. For the systems containing cryptand(Cs<sup>+</sup>) units all-electron calculations were performed using scalar relativistic approximation which is based on full four-component one-electron Dirac equation with spin-orbit effects separated out<sup>3</sup>. The energy optimized extended Gaussian basis set of double-polarized quality for the large component, and the corresponding kinetically balanced basis for the small component was used: Cs [30s28p20d/8s7p4d], Ni [21s16p11d5f/6s5p3d1f], C, N, O [10s7p3d/3s2p1d], and H [6s,2p/2s1p]<sup>4</sup>. The Hirschfeld method was applied to determine the charge on the atoms.<sup>5</sup> All calculations were carried out using the PRIRODA program<sup>6</sup> at Joint Supercomputer Center of Russian Academy of Sciences. In some cases HSEH1PBE functional implemented into GAUSSIAN 09<sup>7</sup> was used and the calculations have been done at Computational Center of ICPC RAS

### References.

1. J. P. Perdew, K. Burke, M. Ernzerhof, *Phys. Rev. Lett.*, 1996, **77**, 3865.
2. W. J. Stevens, H. Basch, M. Krauss, *J. Chem. Phys.*, 1984, **81**, 6026.
3. K. G. Dyall, *J. Chem. Phys.*, 1994, **100**, 2118
4. D. N. Laikov, *Chem. Phys. Lett.* 2005, **416**, 116.
5. F. L. Hirshfeld, *Theor. Chim. Acta*, 1977, **44**, 129.
6. D. N. Laikov, *Chem. Phys. Lett.* 1997, **281**, 151.
7. M. J. Frisch, G. W. Trucks, H. B. Schlegel, G. E. Scuseria, M. A. Robb, J. R. Cheeseman, et. al., 09, Revision D. 01, Gaussian. Inc., Wallingford, CT., 2009

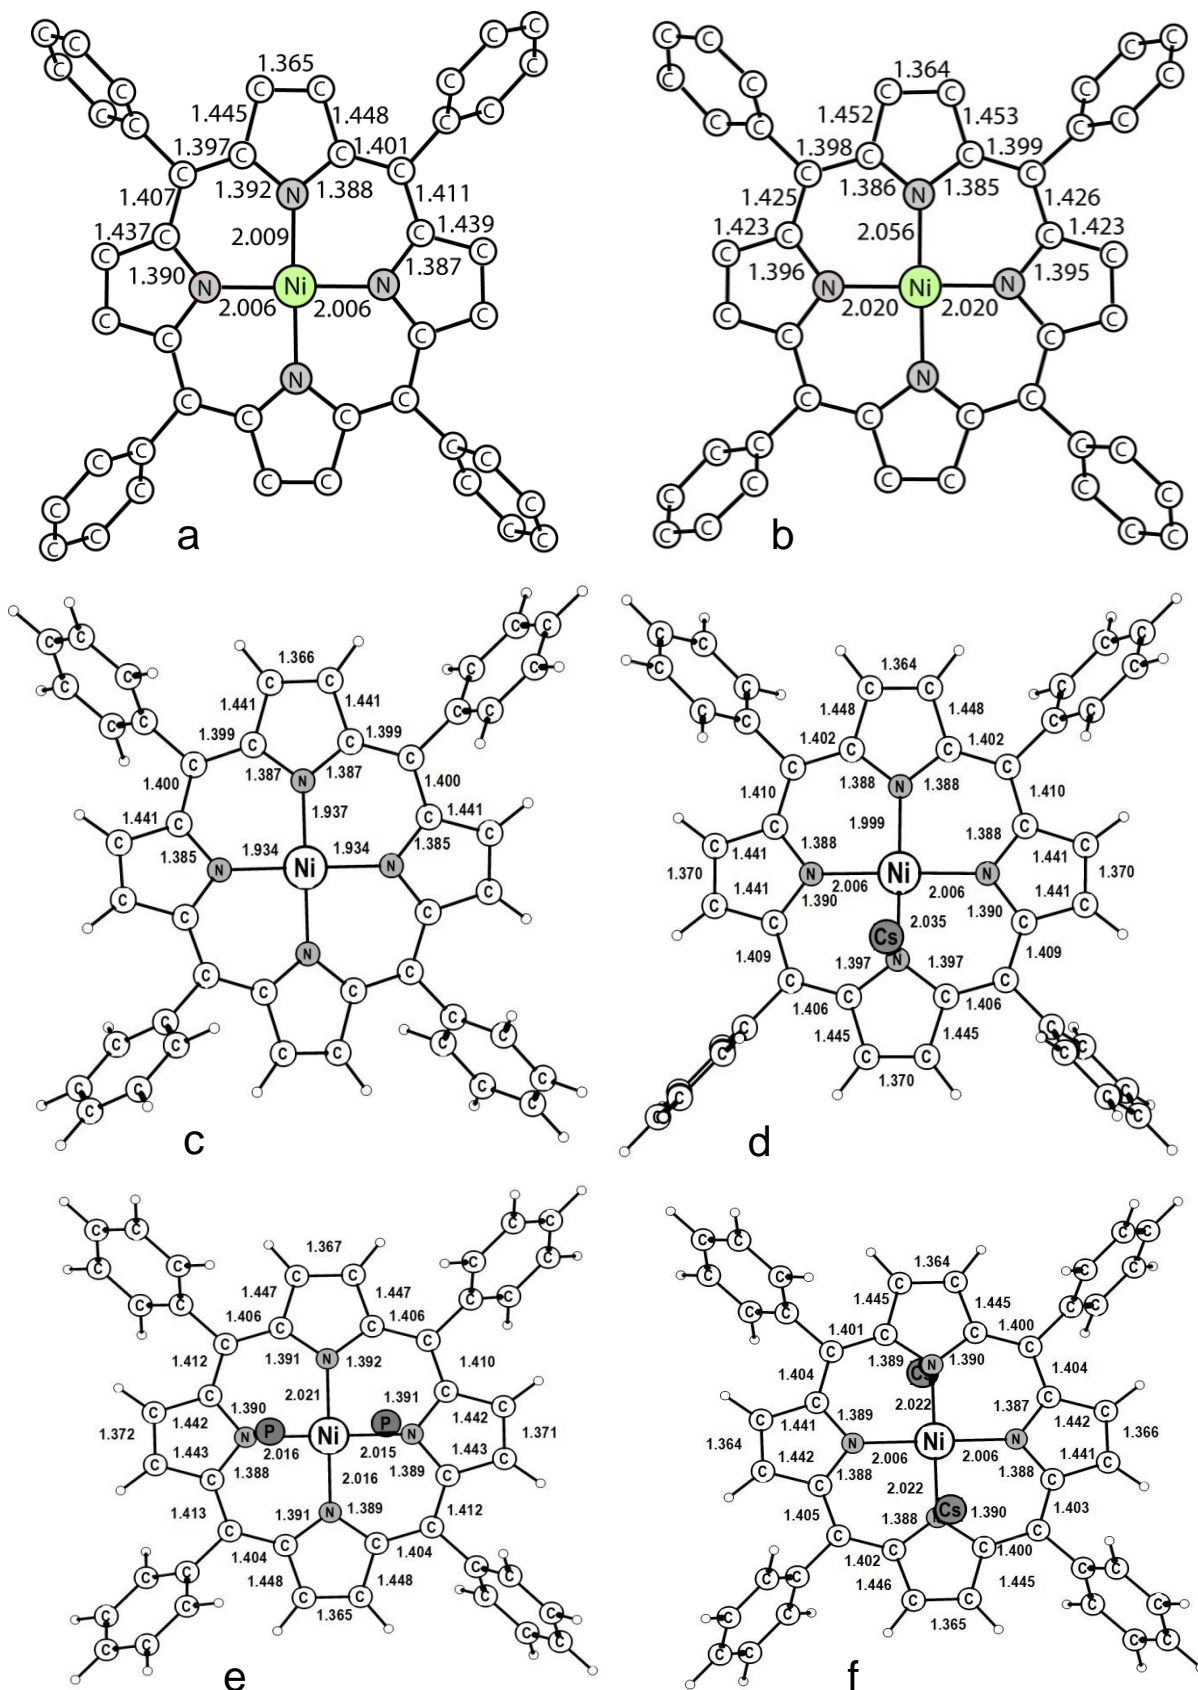

**Fig. S12.** Calculated structures of: (a) the  $\{\text{Ni}^{\text{I}}(\text{TPP}^{2-})\}^-$  anion with  $S = 1/2$  state; (b) the  $\{\text{Ni}^{\text{II}}(\text{TPP}^{3-})\}^-$  anion with  $S = 3/2$  state; (c) initial  $\{\text{Ni}^{\text{II}}(\text{TPP}^{2-})\}^0$ ,  $S = 0$ ; (d)  $[(\text{Cs}^+)\{\text{Ni}^{\text{I}}(\text{TPP}^{2-})\}]^0$ ,  $S = 1/2$ ; (e)  $[(\text{Bu}_3\text{MeP}^+)_2\{\text{Ni}^{\text{I}}(\text{TPP}^{2-})\}]^+$ ,  $S = 1/2$ ; (f)  $[\{\text{Crypt}(\text{Cs}^+)\}_2\{\text{Ni}^{\text{I}}(\text{TPP}^{2-})\}]^+$ ,  $S = 1/2$ . Hydrogen atoms are omitted for (a) and (b). Only Cs and P atoms of the cations are shown in (c) and (d). All distances are shown in Å.

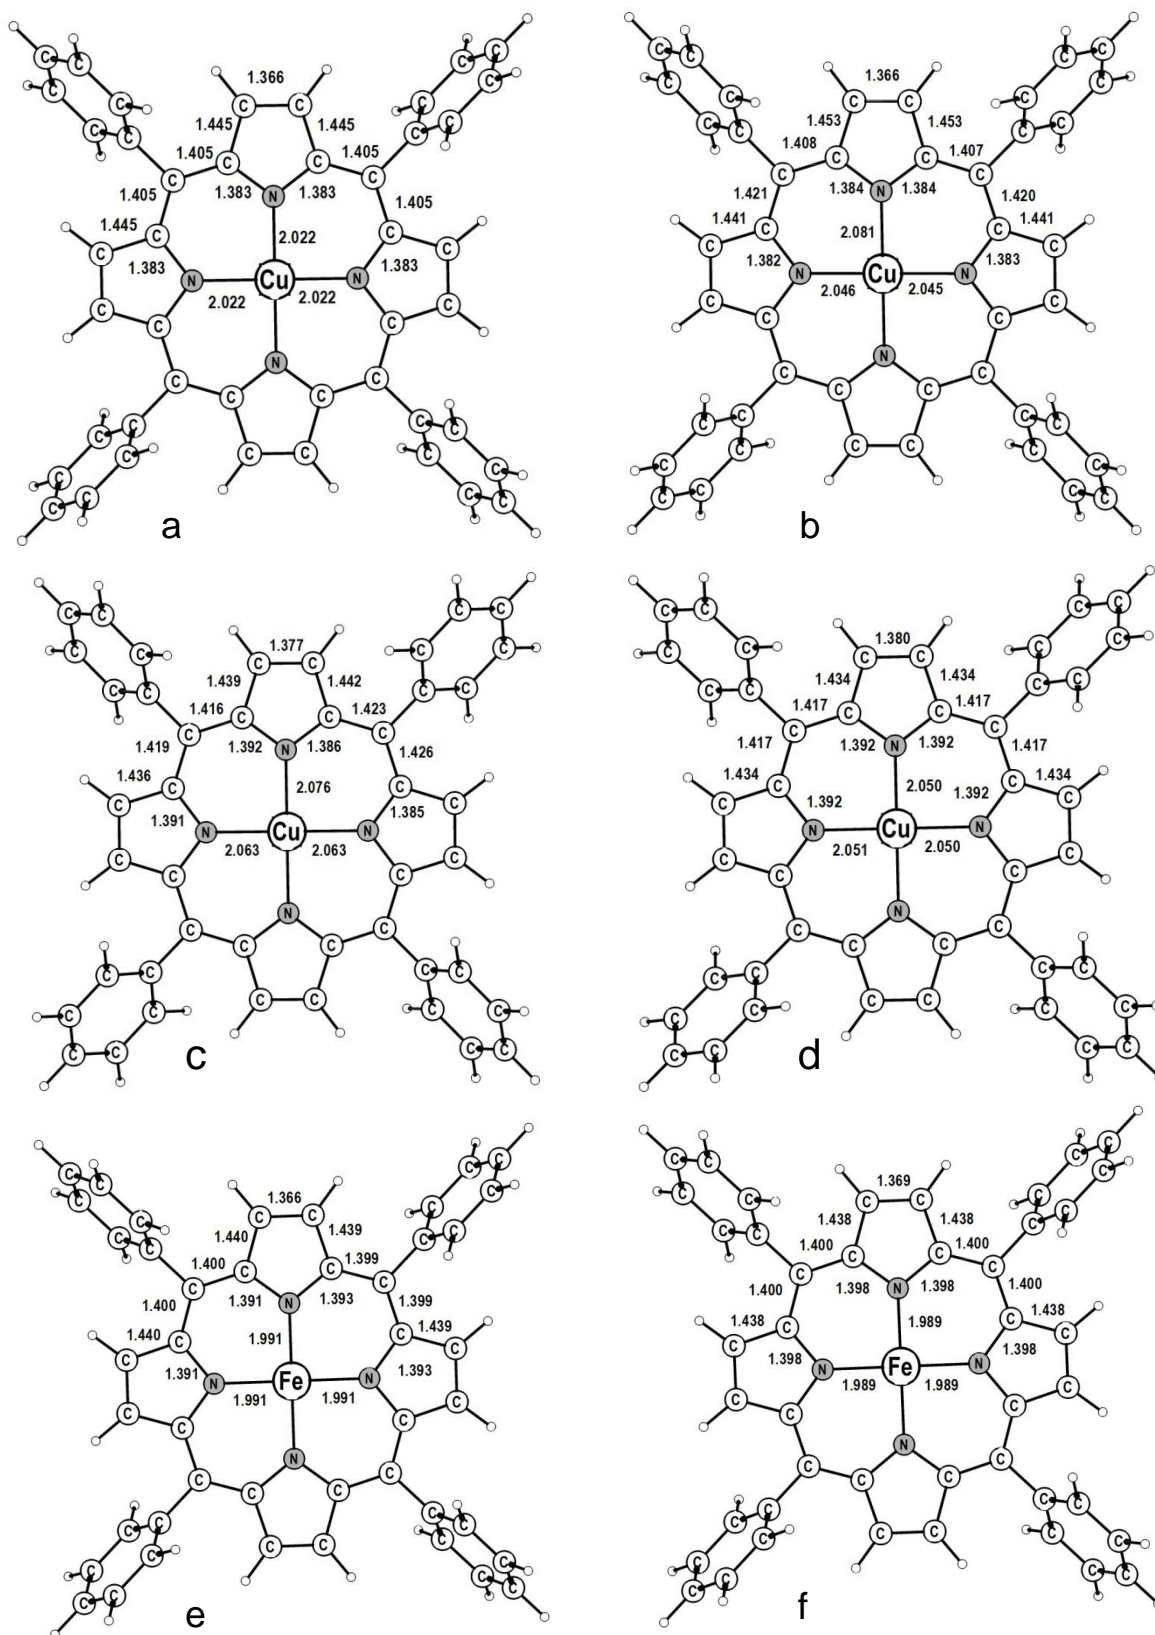

**Fig. S13.** Calculated structure of the complexes (a)  $\{\text{Cu}^{\text{II}}(\text{TPP}^{2-})\}^0$ ,  $S = 1/2$ ; (b)  $\{\text{Cu}^{\text{II}}(\text{TPP}^{3-})\}^-$ ,  $S = 1$ ; (c)  $\{\text{Cu}^{\text{II}}(\text{TPP}^{4-})\}^{2-}$ ,  $S = 1/2$ ; (d)  $\{\text{Cu}^{\text{II}}(\text{TPP}^{4-})\}^{2-}$ ,  $S = 3/2$ ; (e)  $\{\text{Fe}^{\text{II}}(\text{TPP}^{2-})\}^0$ ,  $S = 1$ ; (f)  $\{\text{Fe}^{\text{I}}(\text{TPP}^{2-})\}^-$ ,  $S = 1/2$ . Hydrogen atoms are omitted. All distances are shown in Å.

**Table S3.** Calculated length of the bonds in metal tetraphenylporphyrins. Types of bonds are given according to Scheme 1.

| Complex                                                                        | Spin state | The average length of the bonds, Å |       |       |                |       |       |                |
|--------------------------------------------------------------------------------|------------|------------------------------------|-------|-------|----------------|-------|-------|----------------|
|                                                                                |            | M-N                                | 1     | 2     | Difference 2-1 | 3     | 4     | Difference 4-3 |
| $\text{Ni}^{\text{II}}(\text{TPP}^{2-})^0$                                     | $S = 0$    | 1.934                              | 1.400 |       | 0              | 1.441 |       | 0              |
| $\{\text{Ni}^{\text{I}}(\text{TPP}^{2-})\}^-$                                  | $S = 1/2$  | 2.007                              | 1.407 | 1.397 | 0.010          | 1.446 | 1.438 | 0.008          |
| $\{\text{Ni}^{\text{II}}(\text{TPP}^{\bullet 3-})\}^-$                         | $S = 3/2$  | 2.038                              | 1.425 | 1.398 | 0.027          | 1.453 | 1.423 | 0.030          |
| $\{[\text{Crypt}(\text{Cs}^+)[\text{Ni}^{\text{I}}(\text{TPP}^{2-})]^-]\}$     | $S = 1/2$  | 2.011                              | 1.410 | 1.404 | 0.006          | 1.446 | 1.441 | 0.005          |
| $\{[\text{Cryp}(\text{Cs}^+)]_2[\text{Ni}^{\text{I}}(\text{TPP}^{2-})]^- \}^+$ | $S = 1/2$  | 2.014                              | 1.404 | 1.401 | 0.003          | 1.445 | 1.442 | 0.003          |
| $\{[\text{Bu}_3\text{MeP}^+]_2[\text{Ni}^{\text{I}}(\text{TPP}^{2-})]^- \}^+$  | $S = 1/2$  | 2.017                              | 1.412 | 1.406 | 0.006          | 1.447 | 1.442 | 0.005          |
| $\{\text{Cu}^{\text{II}}(\text{TPP}^{2-})\}^0$                                 | $S = 1/2$  | 2.022                              | 1.405 | 1.405 | 0              | 1.445 | 1.445 | 0              |
| $\{\text{Cu}^{\text{II}}(\text{TPP}^{3-})\}^-$                                 | $S = 1$    | 2.063                              | 1.421 | 1.408 | 0.013          | 1.453 | 1.441 | 0.012          |
| $\{\text{Cu}^{\text{II}}(\text{TPP}^{4-})\}^{2-}$                              | $S = 1/2$  | 2.070                              | 1.419 | 1.416 | 0.003          | 1.439 | 1.436 | 0.003          |
| $\{\text{Cu}^{\text{II}}(\text{TPP}^{4-})\}^{2-}$                              | $S = 3/2$  | 2.070                              | 1.417 | 1.417 | 0              | 1.434 | 1.434 | 0              |
| $\{\text{Fe}^{\text{II}}(\text{TPP}^{2-})\}$                                   | $S = 1$    | 1.991                              | 1.400 | 1.399 | 0.001          | 1.440 | 1.440 | 0              |
| $\{\text{Fe}^{\text{I}}(\text{TPP}^{2-})\}^-$                                  | $S = 1/2$  | 1.989                              | 1.400 | 1.400 | 0              | 1.438 | 1.438 | 0              |

Charge on the  $\text{Fe}^{\text{II}}$  atom is appreciably higher in  $\{\text{Fe}^{\text{II}}(\text{TPP}^{2-})\}^0$  compared to the neutral  $\{\text{Ni}^{\text{II}}(\text{TPP}^{2-})\}^0$  complex. That leads to its greater electron affinity, 1.96 eV, compared to that of the nickel analog, 1.64 eV. The excited quintet  $S = 2$  state of  $\{\text{Fe}^{\text{II}}(\text{TPP}^{2-})\}^0$  is positioned by 0.38 eV higher, than the ground  $S = 1$  state. The spin density on the metal atom increases from 2.097 ( $S = 1$ ) to 3.537 ( $S = 2$ ). Due to the population of a strongly delocalized  $x^2-y^2$  orbital, charge on the metal atom increases in the excited state to 0.255. In both complexes  $\{\text{Fe}^{\text{II}}(\text{TPP}^{2-})\}^0$  ( $S = 1$ ) and  $\{\text{Fe}^{\text{I}}(\text{TPP}^{2-})\}^-$  ( $S = 1/2$ ), the value of a spin density on the metal atom is higher than the formal theoretical values, that is due to the noticeable nonequivalence of similar orbitals populated with the electrons with opposite spin orientations.

## Cartesian coordinates of the considered systems

{Ni<sup>II</sup>(TPP<sup>2-</sup>)<sup>0</sup>}

charge=0 mult=1

|    |             |             |             |
|----|-------------|-------------|-------------|
| 28 | 2.62588179  | 10.54135049 | 18.39888505 |
| 7  | 2.84595201  | 8.64655336  | 18.69031759 |
| 7  | 3.51350086  | 10.37511136 | 16.68904647 |
| 6  | 3.03160457  | 14.95192695 | 12.09318729 |
| 6  | 7.25436714  | 5.15905959  | 15.41236571 |
| 6  | 3.52100341  | 11.29544912 | 15.65422098 |
| 6  | 4.33781735  | 10.82340891 | 14.56440099 |
| 1  | 4.51186774  | 11.36574824 | 13.64070353 |
| 6  | 4.87541077  | 9.63166237  | 14.95978334 |
| 1  | 5.56785086  | 8.99641306  | 14.41763484 |
| 6  | 4.32594636  | 9.33570629  | 16.25886588 |
| 6  | 4.50292234  | 8.11922957  | 16.92642645 |
| 6  | 3.72101791  | 7.79154228  | 18.03998124 |
| 6  | 3.59352915  | 6.45180387  | 18.55584289 |
| 1  | 4.17133293  | 5.59885916  | 18.21484937 |
| 6  | 2.59850199  | 6.48075476  | 19.49142956 |
| 1  | 2.21310618  | 5.66074824  | 20.08866339 |
| 6  | 2.15986693  | 7.84995705  | 19.59268052 |
| 6  | 2.97662384  | 12.58404139 | 15.70151239 |
| 6  | 3.00076312  | 13.41818043 | 14.46083687 |
| 6  | 3.88419266  | 14.50456201 | 14.32155887 |
| 1  | 4.57014250  | 14.74416684 | 15.13603266 |
| 6  | 3.89933867  | 15.26481531 | 13.14665135 |
| 1  | 4.59528953  | 16.10044189 | 13.05297880 |
| 6  | 2.15200117  | 13.87022911 | 12.21973355 |
| 1  | 1.47225241  | 13.61819312 | 11.40381240 |
| 6  | 2.13897982  | 13.10719815 | 13.39293314 |
| 1  | 1.45306701  | 12.26363937 | 13.49014427 |
| 6  | 5.45127532  | 7.09748716  | 16.38701226 |
| 6  | 5.19742442  | 6.42619539  | 15.17664955 |
| 1  | 4.28666274  | 6.65363691  | 14.61979413 |
| 6  | 6.09190180  | 5.46421277  | 14.69393388 |
| 1  | 5.87647619  | 4.94856672  | 13.75632949 |
| 6  | 7.51462500  | 5.81867357  | 16.61945819 |
| 1  | 8.41816167  | 5.58766393  | 17.18650774 |
| 6  | 6.61864155  | 6.77808980  | 17.10475632 |
| 1  | 6.82264097  | 7.29146091  | 18.04619241 |
| 7  | 2.40358926  | 12.44349140 | 18.10585834 |
| 7  | 1.74003944  | 10.69501932 | 20.11096407 |
| 6  | -0.82168857 | 5.39029494  | 22.96402634 |
| 6  | 1.01477272  | 16.41793869 | 23.11643976 |
| 6  | 1.16517034  | 9.67592551  | 20.85683798 |
| 6  | 0.52039953  | 10.21263877 | 22.02870356 |
| 1  | -0.03075972 | 9.62861756  | 22.75816069 |
| 6  | 0.76573112  | 11.55632119 | 22.03543514 |
| 1  | 0.44469596  | 12.29457641 | 22.76317011 |
| 6  | 1.49177024  | 11.85455666 | 20.82641158 |
| 6  | 1.73066691  | 13.15882500 | 20.37849065 |
| 6  | 2.08715051  | 13.40973790 | 19.04922233 |

|   |             |             |             |
|---|-------------|-------------|-------------|
| 6 | 2.03746558  | 14.71375425 | 18.43722444 |
| 1 | 1.83194555  | 15.64035297 | 18.96256827 |
| 6 | 2.24922060  | 14.53229094 | 17.10032977 |
| 1 | 2.25383686  | 15.28147206 | 16.31579393 |
| 6 | 2.52356209  | 13.13058827 | 16.90694970 |
| 6 | 1.28488091  | 8.30922052  | 20.58382186 |
| 6 | 0.55962084  | 7.30747177  | 21.42349574 |
| 6 | -0.48034751 | 6.54648090  | 20.85773058 |
| 1 | -0.75021603 | 6.70724427  | 19.81238602 |
| 6 | -1.16733143 | 5.59752235  | 21.62321558 |
| 1 | -1.97500907 | 5.02006143  | 21.16988416 |
| 6 | 0.21614443  | 6.13742876  | 23.53435124 |
| 1 | 0.49825454  | 5.97627798  | 24.57639171 |
| 6 | 0.90137471  | 7.08930281  | 22.77073123 |
| 1 | 1.71767270  | 7.66163095  | 23.21502884 |
| 6 | 1.47481840  | 14.29663391 | 21.31445476 |
| 6 | 2.35355608  | 14.52930527 | 22.38835401 |
| 1 | 3.22077250  | 13.87915675 | 22.51772929 |
| 6 | 2.12711643  | 15.58388522 | 23.28025245 |
| 1 | 2.82256595  | 15.75326519 | 24.10424948 |
| 6 | 0.12947915  | 16.18999267 | 22.05581002 |
| 1 | -0.74541561 | 16.82955393 | 21.92572109 |
| 6 | 0.35752453  | 15.13814496 | 21.16125219 |
| 1 | -0.34088522 | 14.95662253 | 20.34223946 |
| 1 | 0.83676643  | 17.23895790 | 23.81294990 |
| 1 | 3.04346646  | 15.54579115 | 11.17772474 |
| 1 | -1.35580780 | 4.64883380  | 23.56055049 |
| 1 | 7.95180780  | 4.40942191  | 15.03487045 |

{Ni<sup>I</sup>(TPP<sup>2-</sup>)<sup>-</sup>} S = 1/2

charge=-1 mult=2

|    |            |             |             |
|----|------------|-------------|-------------|
| 28 | 2.62373609 | 10.52008283 | 18.39795084 |
| 7  | 2.81404076 | 8.54360182  | 18.68632455 |
| 7  | 3.42894269 | 10.33666905 | 16.56690054 |
| 6  | 4.61572407 | 15.46625588 | 12.71535432 |
| 6  | 5.87566865 | 4.70179706  | 14.38644874 |
| 6  | 3.76720763 | 11.36037464 | 15.69292493 |
| 6  | 4.56260254 | 10.85207243 | 14.59500762 |
| 1  | 4.98520527 | 11.45329618 | 13.79611523 |
| 6  | 4.71252512 | 9.51179305  | 14.80142492 |
| 1  | 5.26716947 | 8.80226836  | 14.19497088 |
| 6  | 4.00936016 | 9.19453367  | 16.02348202 |
| 6  | 3.98816966 | 7.91494636  | 16.58459223 |
| 6  | 3.43174240 | 7.62554611  | 17.84448247 |
| 6  | 3.41463577 | 6.31108873  | 18.42425874 |
| 1  | 3.80652394 | 5.41191866  | 17.95925081 |
| 6  | 2.78779657 | 6.42306116  | 19.64009735 |
| 1  | 2.62576454 | 5.64312023  | 20.37722461 |
| 6  | 2.41719546 | 7.80545847  | 19.79115701 |
| 6  | 3.45955031 | 12.71753490 | 15.85234091 |
| 6  | 3.85649913 | 13.66794815 | 14.77294228 |
| 6  | 4.77529473 | 14.70912295 | 15.01849497 |
| 1  | 5.19981659 | 14.81110514 | 16.01869251 |



6 5.15105746 15.59626855 14.00402677  
1 5.87097418 16.38913743 14.21984214  
6 3.70124522 14.43780242 12.45518998  
1 3.27162762 14.32699938 11.45684887  
6 3.32657370 13.55133197 13.47142851  
1 2.60999446 12.75432750 13.26511647  
6 4.63940500 6.80141914 15.82811619  
6 4.09381398 6.33568452 14.61627511  
1 3.18093637 6.79895823 14.23752170  
6 4.70464850 5.29746440 13.90218432  
1 4.26118274 4.95149845 12.96574691  
6 6.42947875 5.15474754 15.59122953  
1 7.34585328 4.70201884 15.97660528  
6 5.81674044 6.19206092 16.30367134  
1 6.25068452 6.54493169 17.24086805  
7 2.43308472 12.49643485 18.10901039  
7 1.81911407 10.70260051 20.22941639  
6 0.57805976 5.56257390 24.05098392  
6 -0.59010734 16.34446733 22.43093202  
6 1.47334119 9.67831220 21.09996991  
6 0.68109454 10.18877043 22.19929944  
1 0.25402428 9.58818846 22.99628961  
6 0.54263689 11.53106893 21.99830156  
1 -0.00664170 12.24280273 22.60706321  
6 1.24737991 11.84705318 20.77684876  
6 1.27265127 13.12742030 20.21751352  
6 1.82151584 13.41557827 18.95416823  
6 1.83336796 14.72911726 18.37218483  
1 1.44480277 15.62881312 18.83895403  
6 2.44887259 14.61516087 17.15076609  
1 2.60367422 15.39373689 16.41068489  
6 2.81969234 13.23286424 16.99931053  
6 1.77256645 8.31983246 20.93592979  
6 1.36314894 7.36668623 22.00826137  
6 0.43850737 6.33347205 21.75118280  
1 0.02056890 6.23934707 20.74745534  
6 0.05002136 5.44342551 22.75826016  
1 -0.67405937 4.65686723 22.53347910  
6 1.49823714 6.58290389 24.32259820  
1 1.92238227 6.68508029 25.32419572  
6 1.88583306 7.47213955 23.31361779  
1 2.60623251 8.26322346 23.52920476  
6 0.62984170 14.24269443 20.97883138  
6 1.18687201 14.70754790 22.18574729  
1 2.10213354 14.24252393 22.55654347  
6 0.58409628 15.74690471 22.90504474  
1 1.03623316 16.09215823 23.83758908  
6 -1.15532405 15.89224477 21.23118694  
1 -2.07438562 16.34636030 20.85390829  
6 -0.55063796 14.85374390 20.51355761  
1 -0.99355309 14.50128787 19.58040871  
1 -1.06132657 17.15490302 22.99106308  
1 4.90832069 16.15879087 11.92335453

1 0.27554813 4.86779834 24.83727813  
1 6.35311042 3.89220196 13.83038998

{Ni<sup>I</sup>(TPP<sup>2-</sup>)<sup>-</sup>} S = 3/2

charge=-1 mult=4

28 2.62373155 10.51952316 18.39778601  
7 2.86588853 8.50177024 18.71080443  
7 3.52481641 10.34614735 16.59796300  
6 4.59112743 15.48379672 12.70560586  
6 5.81100415 4.65427520 14.34736541  
6 3.84334092 11.38076222 15.71694574  
6 4.62599397 10.88234775 14.63872337  
1 5.03697042 11.47436244 13.82702495  
6 4.78407421 9.51678558 14.84776433  
1 5.34433449 8.81899244 14.23346432  
6 4.09585943 9.19690636 16.05159379  
6 4.05260147 7.89054529 16.62200333  
6 3.48098030 7.59496937 17.86409025  
6 3.42500634 6.26290012 18.44206194  
1 3.81526826 5.36024736 17.98207339  
6 2.79567781 6.37600685 19.64649198  
1 2.59152118 5.58633599 20.36314822  
6 2.43416091 7.77334255 19.80783635  
6 3.48863825 12.75175885 15.87706125  
6 3.87637189 13.69180857 14.78336022  
6 4.80776627 14.72674803 15.00358275  
1 5.25897474 14.82674282 15.99236825  
6 5.15849700 15.61451580 13.97883195  
1 5.88333836 16.40776218 14.17641673  
6 3.66984731 14.45409115 12.46815428  
1 3.21522480 14.34365642 11.48093567  
6 3.32015136 13.56918917 13.49383071  
1 2.59899032 12.77158182 13.30649139  
6 4.66621556 6.77890609 15.83768241  
6 4.14275987 6.40467425 14.58279847  
1 3.27751066 6.94390383 14.19299499  
6 4.70473547 5.35574777 13.84751143  
1 4.27166804 5.07945162 12.88334422  
6 6.34778754 5.01806333 15.58821156  
1 7.21511711 4.48616703 15.98624787  
6 5.78488788 6.06993220 16.32147040  
1 6.21411215 6.35648341 17.28321062  
7 2.38058092 12.53689947 18.08429394  
7 1.72279321 10.69325251 20.19764221  
6 0.67094625 5.56159669 24.09978694  
6 -0.59537726 16.37984355 22.43003790  
6 1.41212157 9.65988446 21.08269533  
6 0.63220639 10.15812554 22.16316871  
1 0.22820294 9.56667291 22.97878094  
6 0.46662804 11.52212216 21.95047673  
1 -0.09465986 12.21914216 22.56468572  
6 1.14836306 11.84139805 20.74278537  
6 1.18545724 13.14631419 20.16898959

|   |             |             |             |
|---|-------------|-------------|-------------|
| 6 | 1.75877680  | 13.44218752 | 18.92777494 |
| 6 | 1.81112873  | 14.77371379 | 18.34834410 |
| 1 | 1.41494883  | 15.67520309 | 18.80559126 |
| 6 | 2.44642205  | 14.66192541 | 17.14693581 |
| 1 | 2.64993953  | 15.45124489 | 16.42978336 |
| 6 | 2.81430063  | 13.26591355 | 16.98845483 |
| 6 | 1.76658078  | 8.28902168  | 20.92236270 |
| 6 | 1.38212186  | 7.34996713  | 22.01825828 |
| 6 | 0.43986946  | 6.32367733  | 21.80494150 |
| 1 | -0.02042958 | 6.22815796  | 20.81989993 |
| 6 | 0.09112611  | 5.43728218  | 22.83156269 |
| 1 | -0.64245808 | 4.65069839  | 22.64002339 |
| 6 | 1.60293054  | 6.58311758  | 24.33049088 |
| 1 | 2.06709419  | 6.68863666  | 25.31378986 |
| 6 | 1.95086540  | 7.46646021  | 23.30279589 |
| 1 | 2.67969248  | 8.25840382  | 23.48459548 |
| 6 | 0.56442884  | 14.25700138 | 20.94908142 |
| 6 | 1.08579556  | 14.64084758 | 22.20183244 |
| 1 | 1.95533331  | 14.11006334 | 22.59366921 |
| 6 | 0.51633827  | 15.68900657 | 22.93253514 |
| 1 | 0.94774540  | 15.97304108 | 23.89519393 |
| 6 | -1.13004242 | 16.00644781 | 21.19112770 |
| 1 | -2.00142933 | 16.53006288 | 20.79100095 |
| 6 | -0.55955877 | 14.95548086 | 20.46245312 |
| 1 | -0.98656260 | 14.66132922 | 19.50201461 |
| 1 | -1.04044720 | 17.19841523 | 22.99958074 |
| 1 | 4.86443437  | 16.17515722 | 11.90568745 |
| 1 | 0.39890854  | 4.87144141  | 24.90118096 |
| 1 | 6.25024973  | 3.83498943  | 13.77433750 |

(Cs<sup>+</sup>){Ni<sup>I</sup>(TPP<sup>2-</sup>)<sup>-</sup> S = 1/2

charge=0 mult=2

|    |             |            |             |
|----|-------------|------------|-------------|
| 28 | 2.61951340  | 7.38450385 | 19.77515550 |
| 7  | 4.38256371  | 7.41498939 | 20.73238368 |
| 7  | 3.18529464  | 5.76463675 | 18.75025450 |
| 6  | -0.58246686 | 3.01134334 | 14.20910867 |
| 6  | 9.13453581  | 3.17633508 | 19.31886493 |
| 6  | 2.50432216  | 5.17316342 | 17.69545927 |
| 6  | 3.36726884  | 4.25166858 | 16.98590604 |
| 1  | 3.08990270  | 3.68581842 | 16.10203648 |
| 6  | 4.57451551  | 4.27131480 | 17.62101803 |
| 1  | 5.47460229  | 3.72558277 | 17.35580108 |
| 6  | 4.45506279  | 5.20482458 | 18.72177815 |
| 6  | 5.49949041  | 5.49703764 | 19.60963864 |
| 6  | 5.43264757  | 6.52141637 | 20.57567387 |
| 6  | 6.46669745  | 6.77784788 | 21.54622672 |
| 1  | 7.37382015  | 6.19432138 | 21.66688560 |
| 6  | 6.05081027  | 7.84557739 | 22.29804108 |
| 1  | 6.58315814  | 8.33556450 | 23.10739343 |
| 6  | 4.76678297  | 8.24390815 | 21.78001248 |
| 6  | 1.17468936  | 5.42805669 | 17.33243358 |
| 6  | 0.56414084  | 4.59559768 | 16.25179133 |
| 6  | 0.14869836  | 5.17307920 | 15.03625911 |

1 0.28063293 6.24633286 14.88711985  
6 -0.41608494 4.38961465 14.02395233  
1 -0.72339691 4.85653952 13.08603255  
6 -0.17684303 2.42447295 15.41386951  
1 -0.30778495 1.35216822 15.57170647  
6 0.39291668 3.20831523 16.42362303  
1 0.70385063 2.74847445 17.36324880  
6 6.75818449 4.69712260 19.51092741  
6 6.75225089 3.31239351 19.76710552  
1 5.81513569 2.82958973 20.04947948  
6 7.92867922 2.55995652 19.67440971  
1 7.90281388 1.48908508 19.88523969  
6 9.15447752 4.55257648 19.05975819  
1 10.08812270 5.04240540 18.77600253  
6 7.97869146 5.30456297 19.15773301  
1 7.99665796 6.37622954 18.95131828  
7 0.83545665 7.36368537 18.85739152  
7 2.10118909 9.11694066 20.70817750  
6 5.68944646 11.61020061 25.55853265  
6 -3.97379581 11.49011018 20.42297922  
6 2.81343191 9.77163464 21.71572951  
6 2.03939875 10.87169063 22.24346969  
1 2.35107674 11.52768040 23.05108648  
6 0.82889712 10.85590664 21.60113979  
1 -0.02796696 11.49626061 21.78929592  
6 0.85436283 9.74579086 20.67647999  
6 -0.26559440 9.31396104 19.94479926  
6 -0.26405832 8.17364949 19.11707228  
6 -1.40666811 7.73824196 18.35513533  
1 -2.38564031 8.20722986 18.36337546  
6 -0.99750029 6.66582225 17.60633910  
1 -1.59612736 6.05786169 16.93558028  
6 0.39236849 6.44474290 17.91668718  
6 4.05618233 9.37161318 22.23672957  
6 4.62692969 10.15086658 23.38063478  
6 4.64095180 9.60433273 24.67789786  
1 4.23127298 8.60507154 24.83499506  
6 5.16606251 10.32612488 25.75558618  
1 5.16310950 9.88419433 26.75375463  
6 5.68426765 12.16594031 24.27388568  
1 6.09500754 13.16379593 24.10751071  
6 5.15811973 11.44074707 23.19809326  
1 5.16337602 11.87635468 22.19597633  
6 -1.54767192 10.07073815 20.10251039  
6 -1.71594203 11.35276180 19.54817004  
1 -0.89531937 11.79808013 18.98050345  
6 -2.91498554 12.05812250 19.70504013  
1 -3.02369637 13.05009815 19.26199391  
6 -3.82213172 10.21366814 20.97919863  
1 -4.64073915 9.76241734 21.54304547  
6 -2.62206151 9.51173511 20.82024568  
1 -2.50592584 8.51859757 21.25751328  
1 -4.90994785 12.03704307 20.54717501

1 -1.02496223 2.39985880 13.42071947  
1 6.09894264 12.17272589 26.39926137  
1 10.05165233 2.58924211 19.24471534  
55 3.24961559 11.01315264 18.49223733

$[(\text{Bu}_3\text{MeP}^+)_2\{\text{Ni}^{\text{I}}(\text{TPP}^{2-})\}]^+$ ,  $S = 1/2$

charge=1 mult=2

28 0.16839528 -0.42099121 0.92708390  
7 -0.07278467 -0.97015113 2.85062746  
7 2.16938921 -0.62114390 1.12307680  
6 6.29682011 0.75544945 -3.73347282  
6 5.01337016 -2.16290501 6.77818629  
6 3.13272245 -0.24236254 0.19351076  
6 4.43872172 -0.18557490 0.81330422  
1 5.35713003 0.11593042 0.31937006  
6 4.27637542 -0.55790912 2.11853666  
1 5.03879815 -0.62140167 2.88884290  
6 2.86982696 -0.83970234 2.30545019  
6 2.30800727 -1.24487609 3.52955116  
6 0.91921887 -1.32186626 3.76070289  
6 0.33018719 -1.74836523 5.00590142  
1 0.87612479 -2.11568393 5.86909267  
6 -1.02812435 -1.62343623 4.86779944  
1 -1.79020943 -1.82690390 5.61342865  
6 -1.27141423 -1.13361436 3.53287055  
6 2.89449331 0.04370038 -1.16213862  
6 4.07000000 0.28889923 -2.05291499  
6 4.23852423 1.52686285 -2.70366030  
1 3.49866918 2.31442961 -2.54910429  
6 5.34111636 1.75906122 -3.53289621  
1 5.45571752 2.72846478 -4.02109561  
6 6.14233489 -0.48063799 -3.09454783  
1 6.88180029 -1.26939069 -3.24461148  
6 5.04141390 -0.70978293 -2.26171316  
1 4.92996548 -1.67416574 -1.76187676  
6 3.23777845 -1.56138023 4.65844791  
6 4.15318801 -2.62657349 4.55653055  
1 4.16980002 -3.22614884 3.64495347  
6 5.02970935 -2.92648667 5.60502172  
1 5.72602366 -3.76115141 5.50648611  
6 4.11032988 -1.09931206 6.89448026  
1 4.09056553 -0.49685767 7.80454204  
6 3.23154524 -0.80479325 5.84629227  
1 2.52551493 0.02190004 5.94727585  
7 0.40704691 0.05640458 -1.01741349  
7 -1.82145872 -0.15440926 0.74657675  
6 -5.95873361 -1.33301651 5.64417809  
6 -4.65681293 1.10573014 -4.99577627  
6 -2.78741126 -0.35954472 1.72391858  
6 -4.11097193 -0.13518284 1.18086408  
1 -5.04136205 -0.23194155 1.73118627  
6 -3.95198673 0.18115373 -0.13705738  
1 -4.72780381 0.41165521 -0.85988736

6 -2.53140077 0.13601759 -0.41383425  
6 -1.97720777 0.31598968 -1.69113288  
6 -0.59261104 0.24303099 -1.96274846  
6 -0.01919260 0.37842637 -3.27946997  
1 -0.57640150 0.53130714 -4.19852371  
6 1.34358223 0.31537644 -3.13020161  
1 2.09788849 0.36606856 -3.90924019  
6 1.60235246 0.12984045 -1.72384562  
6 -2.55151996 -0.81312136 3.03155726  
6 -3.73034200 -0.99683823 3.93666985  
6 -4.12986682 -2.27924230 4.35773166  
1 -3.57094827 -3.15162329 4.01391880  
6 -5.23346033 -2.44613131 5.20194451  
1 -5.53023412 -3.44976099 5.51155958  
6 -5.57367108 -0.05173533 5.23213769  
1 -6.13303583 0.82257222 5.57009959  
6 -4.47080407 0.11295363 4.38601525  
1 -4.17962387 1.11409024 4.06057030  
6 -2.90433655 0.58721167 -2.83607298  
6 -2.86933956 1.81944002 -3.51636964  
1 -2.15627055 2.58229794 -3.19904863  
6 -3.73602952 2.07692632 -4.58445691  
1 -3.69551573 3.04161311 -5.09337335  
6 -4.70460783 -0.12376815 -4.32810306  
1 -5.42202584 -0.88625482 -4.63737202  
6 -3.83675733 -0.37905940 -3.25997061  
1 -3.88752959 -1.33616513 -2.73652074  
1 -5.33393640 1.30699681 -5.82719390  
1 7.15608515 0.93584095 -4.38110867  
1 -6.81928123 -1.46356704 6.30198963  
1 5.69757802 -2.39513464 7.59555163  
15 0.28367756 -4.19726671 -1.64417097  
6 0.03237845 -6.01232750 -1.83964483  
1 -1.01678843 -6.14953299 -2.14881097  
1 0.11963402 -6.44760204 -0.83076752  
6 1.98050535 -3.85480519 -1.03482206  
1 2.65587467 -4.13303741 -1.85985236  
1 2.03578323 -2.75893701 -0.91573724  
6 -0.93755435 -3.57323993 -0.44517545  
1 -0.88844582 -4.17681529 0.47098983  
1 -0.69534556 -2.52312884 -0.19117847  
1 -1.94810877 -3.63552859 -0.86970559  
1 1.57929380 -8.50028116 -4.92352424  
6 1.67834929 -8.91082116 -3.90728761  
1 2.72790101 -8.79425385 -3.59748876  
1 0.82267205 -8.66500371 -1.92795840  
6 0.72792885 -8.21110929 -2.92877157  
1 -0.31677466 -8.37232038 -3.24382945  
6 0.99518590 -6.69975507 -2.82345811  
1 2.03827009 -6.53893501 -2.50321050  
1 0.89955635 -6.24580938 -3.82407783  
1 1.46485231 -9.98721718 -3.96108416  
1 2.16275695 -5.64844246 0.20211982

6 2.35467356 -4.56425750 0.28008945  
1 1.71676615 -4.17781787 1.08988689  
1 3.97366818 -4.76525567 1.67509704  
6 3.83268977 -4.35159844 0.66372105  
1 4.03828336 -3.27168629 0.73819788  
1 5.86548669 -4.86714523 0.07161002  
6 4.83734154 -5.01449541 -0.28755057  
1 4.66569266 -6.10020005 -0.36097712  
1 4.79336871 -4.59607966 -1.30492328  
1 0.93977919 -3.69442348 -3.88168025  
6 0.08425103 -3.36473373 -3.26837854  
1 0.22329261 -2.28463628 -3.08651853  
6 -1.24652893 -3.64365906 -3.98953563  
1 -1.39908134 -4.72992045 -4.11002369  
1 -2.08818147 -3.26923710 -3.38443660  
6 -1.29021969 -2.97923756 -5.37662877  
1 -0.43078260 -3.33223415 -5.97193604  
1 -1.15977842 -1.89186607 -5.25815251  
6 -2.59438530 -3.27158928 -6.12684567  
1 -3.46610076 -2.89484631 -5.57143702  
1 -2.59572763 -2.79071891 -7.11483675  
1 -2.73505051 -4.35262783 -6.28085082  
15 0.48634389 3.32796922 3.52113540  
6 0.68291488 5.08254840 4.04472902  
1 1.30667340 5.56898069 3.27707455  
1 1.28117997 5.06571163 4.97059187  
6 -0.44657407 2.38527844 4.79085882  
1 -1.48945390 2.73399756 4.72813397  
1 -0.43648572 1.33704301 4.44505781  
6 2.14785628 2.60382182 3.31528961  
1 2.68182246 2.60982818 4.27446308  
1 2.04137994 1.57104143 2.95107311  
1 2.71511457 3.19241661 2.58231934  
1 -2.30008599 8.11627744 4.00038164  
6 -1.69996777 8.07178485 4.92175685  
1 -2.31541925 7.59967345 5.70240081  
1 0.19939192 7.29624521 5.62910466  
6 -0.39448488 7.29926195 4.69959851  
1 0.21946420 7.81391888 3.94147073  
6 -0.63610679 5.84763510 4.25103258  
1 -1.25604443 5.33453202 5.00544689  
1 -1.21842414 5.85102226 3.31459633  
1 -1.49705540 9.10446765 5.23715772  
1 0.06997961 3.56537726 6.55004309  
6 0.10800645 2.51223397 6.22265061  
1 1.16924476 2.21522216 6.23578085  
1 -0.12772727 1.71157161 8.20176495  
6 -0.66055841 1.64482991 7.23969567  
1 -0.60473355 0.59034113 6.92509076  
1 -2.58963045 1.45117119 8.23183407  
6 -2.12417054 2.05571111 7.44108003  
1 -2.20742880 3.11261660 7.74080933  
1 -2.72811248 1.90938829 6.53317569

|   |             |            |             |
|---|-------------|------------|-------------|
| 1 | -1.42220931 | 3.64669732 | 2.11164614  |
| 6 | -0.41835514 | 3.22790347 | 1.92964063  |
| 1 | -0.54700978 | 2.14754293 | 1.71846839  |
| 6 | 0.28234852  | 3.92986762 | 0.75198298  |
| 1 | 0.55500644  | 4.96646635 | 1.01697678  |
| 1 | 1.21953644  | 3.39899774 | 0.51848911  |
| 6 | -0.60550571 | 3.95045016 | -0.50337009 |
| 1 | -1.53067017 | 4.50996616 | -0.28286781 |
| 1 | -0.91039537 | 2.91848634 | -0.73763730 |
| 6 | 0.10717578  | 4.57578978 | -1.70774882 |
| 1 | 1.00019660  | 3.99605265 | -1.98593227 |
| 1 | -0.55310968 | 4.60957741 | -2.58598365 |
| 1 | 0.42770320  | 5.60776006 | -1.49572408 |

$[\{Cryp(Cs^+)\}_2\{Ni^I(PPP^2-)\}]^+, S = 1/2$

charge=+1 mult=2

|    |             |             |             |
|----|-------------|-------------|-------------|
| 28 | 0.13900189  | 0.09302244  | 0.03114557  |
| 7  | 1.82370428  | 1.10885981  | 0.42434727  |
| 7  | 1.14392262  | -1.65253576 | 0.21189595  |
| 6  | -1.88477445 | -7.40421625 | 0.10969040  |
| 6  | 7.38303787  | -1.90394031 | 2.00073713  |
| 6  | 0.59849630  | -2.93050533 | 0.22122277  |
| 6  | 1.58979460  | -3.89816547 | 0.63302988  |
| 1  | 1.41373054  | -4.96718302 | 0.73569313  |
| 6  | 2.74169879  | -3.20871155 | 0.87713606  |
| 1  | 3.69883625  | -3.60269894 | 1.21286331  |
| 6  | 2.46247653  | -1.81448400 | 0.61750426  |
| 6  | 3.38277605  | -0.78166925 | 0.83998315  |
| 6  | 3.06691099  | 0.58347608  | 0.75063155  |
| 6  | 4.01453532  | 1.64335065  | 0.98811545  |
| 1  | 5.06405958  | 1.50089290  | 1.23480158  |
| 6  | 3.34717155  | 2.82051172  | 0.81336099  |
| 1  | 3.73086984  | 3.83030704  | 0.93847733  |
| 6  | 1.98985214  | 2.48620167  | 0.45939576  |
| 6  | -0.73900791 | -3.25075604 | -0.04143115 |
| 6  | -1.13945077 | -4.69047504 | 0.01058693  |
| 6  | -0.70379946 | -5.59113564 | -0.97420465 |
| 1  | -0.06983384 | -5.22463232 | -1.78691704 |
| 6  | -1.07350586 | -6.93652234 | -0.92634327 |
| 1  | -0.72862852 | -7.62262827 | -1.70472776 |
| 6  | -2.32079183 | -6.51824665 | 1.09771300  |
| 1  | -2.95301670 | -6.87840805 | 1.91447565  |
| 6  | -1.95313713 | -5.17196655 | 1.05000538  |
| 1  | -2.28728597 | -4.48565772 | 1.83566828  |
| 6  | 4.77100267  | -1.16244031 | 1.24391085  |
| 6  | 5.24819640  | -0.89628359 | 2.53798554  |
| 1  | 4.59038901  | -0.39755508 | 3.25668486  |
| 6  | 6.54134227  | -1.26416777 | 2.91361252  |
| 1  | 6.89424711  | -1.05087581 | 3.92667215  |
| 6  | 6.92129803  | -2.17471788 | 0.71096947  |
| 1  | 7.57383256  | -2.67290725 | -0.01123638 |
| 6  | 5.62721995  | -1.80789641 | 0.33735552  |
| 1  | 5.26802232  | -2.02089185 | -0.67363638 |



7 -1.54831766 -0.92250653 -0.35235135  
7 -0.87019771 1.83533108 -0.15370783  
6 2.04994213 7.62101345 0.29680516  
6 -7.02014108 2.04252644 -2.24952317  
6 -0.33398817 3.11544539 -0.12054212  
6 -1.31479165 4.08335915 -0.55872898  
1 -1.14433376 5.15520886 -0.63651391  
6 -2.45057461 3.39062604 -0.86256020  
1 -3.39535970 3.78259185 -1.23425601  
6 -2.17427069 1.99575040 -0.60805622  
6 -3.08373951 0.96283124 -0.86303237  
6 -2.77911384 -0.40001470 -0.72529926  
6 -3.73492333 -1.45907256 -0.93109077  
1 -4.77724292 -1.31470759 -1.20726376  
6 -3.08722279 -2.63414473 -0.67686131  
1 -3.48021397 -3.64578851 -0.75200444  
6 -1.72983329 -2.29765785 -0.32573443  
6 0.99134742 3.44011994 0.20089213  
6 1.36565578 4.88627890 0.23440701  
6 0.81798494 5.74439574 1.20220411  
1 0.11920269 5.33729972 1.93869579  
6 1.15677125 7.09808826 1.23436293  
1 0.72250054 7.74784819 1.99910302  
6 2.60126063 6.77997586 -0.67263562  
1 3.29945408 7.18167289 -1.41255213  
6 2.26306533 5.42606437 -0.70228421  
1 2.69513557 4.77097973 -1.46511272  
6 -4.45014808 1.33450408 -1.34438568  
6 -4.83313250 1.08906653 -2.67365499  
1 -4.11841550 0.62883916 -3.36464279  
6 -6.10821094 1.44180718 -3.12061469  
1 -6.39188171 1.24552529 -4.15865764  
6 -6.64835461 2.29271395 -0.92688445  
1 -7.35642243 2.76101307 -0.23777085  
6 -5.37326881 1.94211199 -0.47909614  
1 -5.08233670 2.13691602 0.55732292  
1 -8.01876211 2.31517314 -2.60080948  
1 -2.17630146 -8.45710433 0.14726046  
1 2.31607343 8.68087056 0.32159289  
1 8.39623960 -2.19058430 2.29400812  
55 -0.16718728 1.88672993 -3.41832680  
55 0.36243554 -1.75302524 3.45929132  
8 -0.43307418 -3.84704138 5.32284884  
8 -2.58622212 -2.73640326 3.83471416  
8 -0.94743669 -1.25499977 8.89545989  
8 -3.19041820 -0.20846179 7.33202533  
8 2.11860175 -0.52377084 5.73460554  
8 -0.01392857 1.10681754 4.65964418  
7 1.21563087 -2.86116769 7.58639237  
7 -2.87065861 0.32784023 4.34614553  
6 0.86448086 -4.27085314 7.40104416  
1 1.66497790 -4.96528615 7.76151183  
1 -0.01628944 -4.47894409 8.02959665

6 0.53484342 -4.67633619 5.96123832  
1 0.21635135 -5.73909595 5.96247358  
1 1.43577805 -4.62211061 5.32403983  
6 -1.79562719 -4.09702426 5.67261932  
1 -2.14840922 -5.02568176 5.17816026  
1 -1.91722095 -4.21454795 6.76750057  
6 -2.65265926 -2.91318894 5.25968330  
1 -2.33539756 -1.99951259 5.79691898  
1 -3.69513875 -3.14218042 5.56520223  
6 -3.60806497 -1.88160057 3.29941490  
1 -3.83367999 -2.26129706 2.28635357  
1 -4.53254614 -1.99116246 3.89907219  
6 -3.22277169 -0.40738802 3.12497130  
1 -4.07589209 0.07277526 2.58007917  
1 -2.37168452 -0.35500957 2.42268491  
6 1.11152504 -2.49458761 9.00495325  
1 1.64646822 -3.22291999 9.66139073  
1 1.60129206 -1.51905341 9.15208825  
6 -0.31296958 -2.35148586 9.52655076  
1 -0.25302010 -2.19860573 10.62714490  
1 -0.89756434 -3.28518262 9.37463867  
6 -2.26712278 -1.06308537 9.38008425  
1 -2.89269920 -1.96600880 9.20791995  
1 -2.26456352 -0.86367076 10.47404314  
6 -2.89821696 0.12178604 8.68201769  
1 -2.20224838 0.98566630 8.73741474  
1 -3.82495577 0.39955888 9.22999766  
6 -3.75484196 0.89649149 6.64393871  
1 -4.71277723 1.20494945 7.11836104  
1 -3.07620432 1.77344158 6.69881071  
6 -4.05436564 0.51904192 5.19904956  
1 -4.73956006 1.29321722 4.77722706  
1 -4.62588160 -0.42231884 5.22563359  
6 2.54432631 -2.54273967 7.05327998  
1 3.36059018 -2.94696420 7.70228730  
1 2.66489025 -3.03758515 6.07398504  
6 2.82321934 -1.05286177 6.86066727  
1 3.91742052 -0.92143977 6.72053099  
1 2.54462336 -0.48704821 7.77142363  
6 2.10790715 0.90707548 5.75561358  
1 1.61775018 1.26694085 6.68338195  
1 3.14329410 1.30952261 5.73268344  
6 1.36194652 1.46153191 4.55713154  
1 1.81644804 1.09411423 3.61019808  
1 1.48780947 2.56527381 4.55887713  
6 -0.81478564 1.63299464 3.59708633  
1 -0.53202269 2.68448139 3.38227831  
1 -0.64745252 1.07745485 2.64672998  
6 -2.28015664 1.63562824 4.01752092  
1 -2.85463552 2.15299886 3.21124431  
1 -2.34828420 2.27124583 4.91477989  
8 -1.67065895 2.55419479 -5.82636553  
8 -2.06664435 -0.10758686 -4.90944651

8 1.50382712 1.56543514 -8.78011003  
8 0.99286596 -1.15737010 -7.83169417  
8 2.32871755 3.24433719 -4.72892895  
8 2.52233442 0.43387217 -4.07921102  
7 0.56647085 3.93485738 -7.20446128  
7 0.60839219 -1.71036516 -4.85605619  
6 -0.84224829 4.26755850 -7.42698832  
1 -0.99911831 5.35416935 -7.64526894  
1 -1.17141056 3.73117295 -8.33144868  
6 -1.78726172 3.90095040 -6.27855618  
1 -2.82564630 4.13140704 -6.59414766  
1 -1.58502548 4.52787211 -5.39160970  
6 -2.31055935 1.56779864 -6.63808225  
1 -3.40924900 1.60969881 -6.48799266  
1 -2.09732079 1.72829795 -7.71331006  
6 -1.77458121 0.19162091 -6.28472720  
1 -0.68903062 0.13452851 -6.49038413  
1 -2.28442608 -0.53801114 -6.94825796  
6 -1.91971744 -1.49387762 -4.56544163  
1 -2.66383065 -1.69941338 -3.77471239  
1 -2.19161620 -2.12087785 -5.43682768  
6 -0.55883244 -1.89812728 -3.98523849  
1 -0.66707342 -2.96374087 -3.65671261  
1 -0.39938802 -1.32806769 -3.05249380  
6 1.29793151 3.94329715 -8.47818470  
1 1.09966572 4.87358915 -9.06360445  
1 2.37803007 3.93074812 -8.26260429  
6 1.01943350 2.75021206 -9.38418107  
1 1.52886385 2.94036258 -10.35503584  
1 -0.06449345 2.65922198 -9.61529443  
6 1.29671265 0.43238417 -9.60874066  
1 0.21654172 0.29006616 -9.83054353  
1 1.82374210 0.54831893 -10.58100599  
6 1.83193117 -0.80517588 -8.92204218  
1 2.86876025 -0.60640210 -8.57676185  
1 1.87692170 -1.62880329 -9.66763242  
6 1.48850771 -2.29894850 -7.15034607  
1 1.52282727 -3.17721646 -7.83252346  
1 2.52950558 -2.12242312 -6.80719824  
6 0.57481292 -2.65399547 -5.98450994  
1 0.82605002 -3.69112409 -5.65576283  
1 -0.45189452 -2.69265089 -6.38188031  
6 1.20027578 4.82196821 -6.22358288  
1 1.39340907 5.83915639 -6.64648698  
1 0.50719101 4.97361320 -5.37803932  
6 2.52509254 4.31514484 -5.65597163  
1 3.03342993 5.16511674 -5.15267442  
1 3.19218605 3.97899777 -6.47406459  
6 3.55689680 2.56157899 -4.45953248  
1 3.97266252 2.14687774 -5.40070991  
1 4.30778001 3.25696303 -4.02689437  
6 3.34268986 1.42857434 -3.47425744  
1 2.90027672 1.81291967 -2.52817386

1 4.33899875 1.01426605 -3.20983817  
6 2.30581467 -0.70724827 -3.24357549  
1 3.24927740 -1.00437986 -2.74026726  
1 1.58641569 -0.48237221 -2.42408267  
6 1.85864492 -1.88681944 -4.09939745  
1 1.81021991 -2.78066729 -3.43129702  
1 2.66757397 -2.07406159 -4.82350486

{Fe<sup>II</sup>(TPP<sup>2-</sup>)<sup>0</sup>}, S = 1

charge=0 mult=3

26 2.62169542 10.51978338 18.39681507  
7 2.84261667 8.56293369 18.69058876  
7 3.53676914 10.35192922 16.63655501  
6 4.60864611 15.47229830 12.74616149  
6 5.89360745 4.68929080 14.41718787  
6 3.83083409 11.37072310 15.73697108  
6 4.57930402 10.85922005 14.61854440  
1 4.94869643 11.45832438 13.79261795  
6 4.73850219 9.51794752 14.82223761  
1 5.26228475 8.80230667 14.19746075  
6 4.08799336 9.20607245 16.06762658  
6 4.05944030 7.92016454 16.61886297  
6 3.46505150 7.63911544 17.85418946  
6 3.41401437 6.31924053 18.42570624  
1 3.82059544 5.42520151 17.96511358  
6 2.76999720 6.43274310 19.62501470  
1 2.55436795 5.64952195 20.34443010  
6 2.41092856 7.81794334 19.78257425  
6 3.49399435 12.72158867 15.88326017  
6 3.88022519 13.67634132 14.79626826  
6 4.91097115 14.61282002 14.99584614  
1 5.43422097 14.63452610 15.95364814  
6 5.27421488 15.50177116 13.97766181  
1 6.08141943 16.21666650 14.14712414  
6 3.57983527 14.54575628 12.53808149  
1 3.05197672 14.51837318 11.58306185  
6 3.22064401 13.65252836 13.55398411  
1 2.41605216 12.93303319 13.39088182  
6 4.69542010 6.79917815 15.85604886  
6 4.09330616 6.29407866 14.68947794  
1 3.15070426 6.72458903 14.34612742  
6 4.68666258 5.24573054 13.97681217  
1 4.20217523 4.86159659 13.07727165  
6 6.50252275 5.18648915 15.57582779  
1 7.44613497 4.76243929 15.92390073  
6 5.90700886 6.23194318 16.29093789  
1 6.38527154 6.62056546 17.19202412  
7 2.39784079 12.47616347 18.10153897  
7 1.71017207 10.68808727 20.15889968  
6 0.59230075 5.55716065 24.02329352  
6 -0.60719557 16.35746258 22.40098888  
6 1.41148538 9.66866268 21.05626197  
6 0.67319092 10.18272099 22.18030675

|   |             |             |             |
|---|-------------|-------------|-------------|
| 1 | 0.30268956  | 9.58384887  | 23.00591204 |
| 6 | 0.52589224  | 11.52626806 | 21.98276084 |
| 1 | 0.01197544  | 12.24442839 | 22.61285067 |
| 6 | 1.17114580  | 11.83648907 | 20.73419269 |
| 6 | 1.19851272  | 13.12208792 | 20.18234450 |
| 6 | 1.77926227  | 13.40066898 | 18.94009903 |
| 6 | 1.82017741  | 14.71862963 | 18.36343984 |
| 1 | 1.41460291  | 15.61292463 | 18.82444389 |
| 6 | 2.45311253  | 14.60304206 | 17.15843129 |
| 1 | 2.65899555  | 15.38449341 | 16.43428346 |
| 6 | 2.81754928  | 13.21892952 | 17.00340886 |
| 6 | 1.73542295  | 8.31546229  | 20.90313809 |
| 6 | 1.33936956  | 7.35843029  | 21.98468687 |
| 6 | 0.29672203  | 6.43634619  | 21.78035839 |
| 1 | -0.22768308 | 6.42725720  | 20.82297597 |
| 6 | -0.07558485 | 5.54453050  | 22.79278258 |
| 1 | -0.89149248 | 4.84051779  | 22.61950228 |
| 6 | 1.63291641  | 6.46939558  | 24.23606922 |
| 1 | 2.16233573  | 6.48369665  | 25.19047112 |
| 6 | 2.00170201  | 7.36501489  | 23.22569211 |
| 1 | 2.81515067  | 8.07362029  | 23.39256982 |
| 6 | 0.57225652  | 14.24476232 | 20.95086048 |
| 6 | 1.19254060  | 14.75622506 | 22.10497932 |
| 1 | 2.14175261  | 14.32939830 | 22.43443797 |
| 6 | 0.60855985  | 15.80613359 | 22.82312595 |
| 1 | 1.10711058  | 16.19521303 | 23.71279776 |
| 6 | -1.23434125 | 15.85361954 | 21.25501692 |
| 1 | -2.18491723 | 16.27360264 | 20.92124177 |
| 6 | -0.64810696 | 14.80681008 | 20.53423132 |
| 1 | -1.14057937 | 14.41321728 | 19.64301064 |
| 1 | -1.06347001 | 17.17478403 | 22.96195812 |
| 1 | 4.89038373  | 16.16705916 | 11.95318471 |
| 1 | 0.30333057  | 4.86035214  | 24.81185605 |
| 1 | 6.35712410  | 3.87305640  | 13.86058659 |

{Fe<sup>I</sup>(TPP<sup>2-</sup>)<sup>-</sup>}, S = 1/2

charge=-1 mult=2

|    |            |             |             |
|----|------------|-------------|-------------|
| 26 | 2.62156030 | 10.51987325 | 18.39664580 |
| 7  | 2.84402596 | 8.56587274  | 18.69479925 |
| 7  | 3.53977574 | 10.35643104 | 16.64013841 |
| 6  | 4.58866005 | 15.47746034 | 12.72325551 |
| 6  | 5.88683346 | 4.68179979  | 14.41094253 |
| 6  | 3.83281482 | 11.37501113 | 15.72869633 |
| 6  | 4.58081929 | 10.86291275 | 14.61185345 |
| 1  | 4.95003452 | 11.45781405 | 13.78242267 |
| 6  | 4.74212989 | 9.51965961  | 14.82110554 |
| 1  | 5.26782786 | 8.80564607  | 14.19486785 |
| 6  | 4.09208844 | 9.20776027  | 16.06589229 |
| 6  | 4.06014033 | 7.92277588  | 16.62102066 |
| 6  | 3.46825054 | 7.63671714  | 17.85730546 |
| 6  | 3.41132707 | 6.31646754  | 18.42543537 |
| 1  | 3.81354049 | 5.41987109  | 17.96438187 |
| 6  | 2.76466337 | 6.42602652  | 19.62712578 |

1 2.54928537 5.63843456 20.34236338  
6 2.40856704 7.81043465 19.78761622  
6 3.48960411 12.72449132 15.87572341  
6 3.86966169 13.67641596 14.78695486  
6 4.86007465 14.65614758 14.99268828  
1 5.35077893 14.71183241 15.96613036  
6 5.21591697 15.54779908 13.97368483  
1 5.98946258 16.29718552 14.15653152  
6 3.60261837 14.50723947 12.50340005  
1 3.10362469 14.44394599 11.53365535  
6 3.24767207 13.61809107 13.52490878  
1 2.47919560 12.86242667 13.35180736  
6 4.69178759 6.80296904 15.85748405  
6 4.12637796 6.33693558 14.65493061  
1 3.21421890 6.80889628 14.28511264  
6 4.71648439 5.28903996 13.93817796  
1 4.25731535 4.94330438 13.00918053  
6 6.46051603 5.13430834 15.60597633  
1 7.37533225 4.67172149 15.98347883  
6 5.86918685 6.18374378 16.31945087  
1 6.31794126 6.53519701 17.25036789  
7 2.39348687 12.47302175 18.09563925  
7 1.70928737 10.68430024 20.15614278  
6 0.59787645 5.54903445 24.03809092  
6 -0.58670390 16.36649040 22.41580967  
6 1.41213992 9.66520197 21.06579259  
6 0.68147989 10.18151494 22.19225627  
1 0.31453657 9.58809412 23.02384833  
6 0.53450138 11.52749976 21.99018621  
1 0.02371010 12.24521602 22.62449678  
6 1.17296357 11.83632067 20.73868037  
6 1.20071589 13.12044336 20.18141032  
6 1.77333040 13.40299221 18.93537538  
6 1.81415939 14.72015956 18.35873226  
1 1.41104989 15.61664403 18.81924404  
6 2.44731935 14.60789355 17.15020533  
1 2.64875935 15.39266187 16.42785600  
6 2.81392513 13.22563864 16.99500219  
6 1.73651104 8.31226481 20.90875166  
6 1.34314848 7.35706942 21.98997599  
6 0.33593475 6.39624887 21.77710541  
1 -0.15715381 6.35778902 20.80401575  
6 -0.03278083 5.50095503 22.78832540  
1 -0.81910261 4.76637969 22.59997645  
6 1.60062025 6.50033131 24.26497757  
1 2.10255031 6.54600659 25.23419735  
6 1.96866552 7.39284640 23.25105090  
1 2.75047260 8.13345457 23.42947406  
6 0.58254541 14.24260710 20.95272706  
6 1.17171687 14.71395913 22.14163596  
1 2.09214563 14.24492295 22.49432005  
6 0.59439490 15.76337409 22.86658506  
1 1.07183512 16.11345411 23.78468252

|   |             |             |             |
|---|-------------|-------------|-------------|
| 6 | -1.18416761 | 15.90834993 | 21.23465685 |
| 1 | -2.10763145 | 16.36766195 | 20.87460687 |
| 6 | -0.60553406 | 14.85744050 | 20.51294189 |
| 1 | -1.07298014 | 14.50119950 | 19.59310977 |
| 1 | -1.03755839 | 17.18574794 | 22.97990762 |
| 1 | 4.86597709  | 16.17202846 | 11.92743827 |
| 1 | 0.31043483  | 4.85176415  | 24.82792690 |
| 1 | 6.34762200  | 3.86370580  | 13.85322432 |

{Cu<sup>II</sup>(TPP<sup>2-</sup>)<sup>0</sup>}, S = 1/2

charge=0 mult=2

|    |             |             |             |
|----|-------------|-------------|-------------|
| 29 | 2.62377004  | 10.52047566 | 18.39812275 |
| 7  | 2.85422772  | 8.53457963  | 18.70304648 |
| 7  | 3.54448942  | 10.35169140 | 16.60553280 |
| 6  | 4.59943048  | 15.47517884 | 12.73230164 |
| 6  | 5.88524831  | 4.68698370  | 14.41240573 |
| 6  | 3.83502172  | 11.37309721 | 15.72013882 |
| 6  | 4.58808306  | 10.86066550 | 14.59896127 |
| 1  | 4.95899313  | 11.45599694 | 13.77101357 |
| 6  | 4.74754568  | 9.51970570  | 14.80697476 |
| 1  | 5.27572873  | 8.80618910  | 14.18296604 |
| 6  | 4.09178501  | 9.20726395  | 16.05564160 |
| 6  | 4.06042981  | 7.92049481  | 16.61905933 |
| 6  | 3.47243591  | 7.62849089  | 17.86135753 |
| 6  | 3.41924991  | 6.30263083  | 18.43240604 |
| 1  | 3.82031719  | 5.40641029  | 17.97057440 |
| 6  | 2.77574458  | 6.41246601  | 19.63275394 |
| 1  | 2.56096906  | 5.62598240  | 20.34876622 |
| 6  | 2.41951737  | 7.80320172  | 19.79288054 |
| 6  | 3.49285528  | 12.72694443 | 15.87560483 |
| 6  | 3.87731269  | 13.68122108 | 14.78703092 |
| 6  | 4.89787733  | 14.62875288 | 14.98748825 |
| 1  | 5.41338662  | 14.66279381 | 15.94908807 |
| 6  | 5.25674087  | 15.51768842 | 13.96776385 |
| 1  | 6.05372571  | 16.24342065 | 14.13968145 |
| 6  | 3.58213676  | 14.53638550 | 12.52240192 |
| 1  | 3.06228259  | 14.49704980 | 11.56345546 |
| 6  | 3.22512870  | 13.64528759 | 13.54090164 |
| 1  | 2.43111246  | 12.91481972 | 13.37496772 |
| 6  | 4.69362084  | 6.79910464  | 15.85449271 |
| 6  | 4.10462731  | 6.31580828  | 14.67170848 |
| 1  | 3.17525544  | 6.76463229  | 14.31620739 |
| 6  | 4.69459238  | 5.26653900  | 13.95772906 |
| 1  | 4.22078479  | 4.90060348  | 13.04505721 |
| 6  | 6.48114898  | 5.16217826  | 15.58689377 |
| 1  | 7.41160734  | 4.71953424  | 15.94697939 |
| 6  | 5.88902437  | 6.20839899  | 16.30357951 |
| 1  | 6.35694854  | 6.57864836  | 17.21764207 |
| 7  | 2.39252745  | 12.50622541 | 18.09274954 |
| 7  | 1.70356506  | 10.68906533 | 20.19099990 |
| 6  | 0.59988138  | 5.55259288  | 24.03491317 |
| 6  | -0.60627927 | 16.35857454 | 22.40265092 |
| 6  | 1.40606077  | 9.66641648  | 21.07274364 |

|   |             |             |             |
|---|-------------|-------------|-------------|
| 6 | 0.65692656  | 10.18007480 | 22.19600591 |
| 1 | 0.28143338  | 9.58422879  | 23.02151005 |
| 6 | 0.50753941  | 11.52300307 | 21.99332711 |
| 1 | -0.01442610 | 12.23819044 | 22.62063764 |
| 6 | 1.16413335  | 11.83517640 | 20.74501165 |
| 6 | 1.19894346  | 13.12269468 | 20.18341412 |
| 6 | 1.78055241  | 13.41344333 | 18.93779073 |
| 6 | 1.82916091  | 14.73836248 | 18.36422151 |
| 1 | 1.43191925  | 15.63530628 | 18.82792530 |
| 6 | 2.46176249  | 14.62652660 | 17.15832629 |
| 1 | 2.66996646  | 15.41207954 | 16.43936732 |
| 6 | 2.81803472  | 13.23582648 | 16.99804654 |
| 6 | 1.74045819  | 8.31114720  | 20.91308849 |
| 6 | 1.34483066  | 7.35390307  | 21.99516051 |
| 6 | 0.31787978  | 6.41572524  | 21.78400180 |
| 1 | -0.19398837 | 6.39241744  | 20.82013419 |
| 6 | -0.05272397 | 5.52340484  | 22.79653862 |
| 1 | -0.85490024 | 4.80537381  | 22.61679163 |
| 6 | 1.62411107  | 6.48146485  | 24.25498215 |
| 1 | 2.14062612  | 6.50993371  | 25.21612155 |
| 6 | 1.99256154  | 7.37628711  | 23.24380915 |
| 1 | 2.79232864  | 8.09864687  | 23.41739851 |
| 6 | 0.57288299  | 14.24520786 | 20.95223350 |
| 6 | 1.16874143  | 14.72529422 | 22.13289555 |
| 1 | 2.09849665  | 14.27331644 | 22.48339921 |
| 6 | 0.58495668  | 15.77511944 | 22.85094870 |
| 1 | 1.06389693  | 16.13847900 | 23.76196622 |
| 6 | -1.20904526 | 15.88648301 | 21.23044236 |
| 1 | -2.14007079 | 16.33199218 | 20.87538427 |
| 6 | -0.62315026 | 14.83957077 | 20.50971604 |
| 1 | -1.09661155 | 14.47138299 | 19.59768022 |
| 1 | -1.06232075 | 17.17594703 | 22.96372519 |
| 1 | 4.87855459  | 16.16921264 | 11.93777290 |
| 1 | 0.31175825  | 4.85584638  | 24.82383633 |
| 1 | 6.34618814  | 3.87008856  | 13.85464967 |

{Cu<sup>II</sup>(TPP<sup>3-</sup>)<sup>-</sup>}, S = 1

charge=-1 mult=3

|    |            |             |             |
|----|------------|-------------|-------------|
| 29 | 2.61944440 | 10.51859764 | 18.39606602 |
| 7  | 2.85933747 | 8.51129878  | 18.70704451 |
| 7  | 3.31997848 | 10.30025257 | 16.44871505 |
| 6  | 4.63931916 | 15.45080286 | 12.70783988 |
| 6  | 5.86868020 | 4.70215203  | 14.34500251 |
| 6  | 3.71006624 | 11.34546834 | 15.62943653 |
| 6  | 4.58640464 | 10.85600109 | 14.57921065 |
| 1  | 5.06401684 | 11.46659379 | 13.81831741 |
| 6  | 4.73989646 | 9.51418051  | 14.78339304 |
| 1  | 5.36757898 | 8.82896334  | 14.22098486 |
| 6  | 3.95851636 | 9.17397894  | 15.96058398 |
| 6  | 3.95452531 | 7.89637353  | 16.55219127 |
| 6  | 3.43236731 | 7.60044953  | 17.84001895 |
| 6  | 3.40012156 | 6.28130250  | 18.42014130 |
| 1  | 3.73842344 | 5.36727731  | 17.94143611 |



6 2.79623956 6.40096860 19.65071518  
1 2.64207225 5.61596653 20.38496246  
6 2.46403778 7.79284094 19.82009401  
6 3.40134575 12.70570646 15.81735864  
6 3.82708293 13.65985973 14.74997162  
6 4.75423065 14.68933620 15.01212494  
1 5.16507308 14.78397799 16.01859388  
6 5.15628404 15.57299485 14.00470568  
1 5.88180606 16.35723771 14.23269652  
6 3.71842119 14.43275635 12.43104387  
1 3.30560583 14.32669221 11.42519545  
6 3.31808804 13.54897888 13.43996478  
1 2.59775042 12.75870419 13.22119384  
6 4.61407668 6.78908357 15.79872022  
6 4.14700868 6.40587625 14.52454513  
1 3.28510934 6.92583831 14.10269623  
6 4.76558659 5.37613861 13.80626371  
1 4.38026718 5.09706321 12.82286173  
6 6.34601152 5.07182990 15.60978577  
1 7.21106807 4.56078252 16.03865609  
6 5.72591546 6.10066406 16.32679895  
1 6.10657694 6.38962924 17.30778125  
7 2.38030063 12.52646204 18.08554558  
7 1.91891279 10.73795144 20.34301848  
6 0.62167017 5.59127469 24.09649037  
6 -0.63674583 16.33730904 22.43900919  
6 1.53442949 9.69334709 21.16554578  
6 0.66032122 10.18262066 22.21778667  
1 0.18696960 9.57238379 22.98161696  
6 0.50229648 11.52356408 22.01120860  
1 -0.12523394 12.20829603 22.57436235  
6 1.27875920 11.86344786 20.83072837  
6 1.28085647 13.14066753 20.23836619  
6 1.80444049 13.43683940 18.95121921  
6 1.83921840 14.75642008 18.37239887  
1 1.50060250 15.67029866 18.85120234  
6 2.44641849 14.63743926 17.14335921  
1 2.60252527 15.42275953 16.40983903  
6 2.77898117 13.24562298 16.97421620  
6 1.84477105 8.33335506 20.97833589  
6 1.42426984 7.38007638 22.04860031  
6 0.49683715 6.34951044 21.79170347  
1 0.08228889 6.25297739 20.78691004  
6 0.09987612 5.46666033 22.80179504  
1 -0.62616583 4.68173084 22.57787230  
6 1.54306679 6.61026689 24.36808854  
1 1.96017159 6.71782468 25.37201578  
6 1.93899164 7.49270570 23.35620106  
1 2.65955536 8.28382472 23.57103286  
6 0.62000603 14.24833261 20.99028356  
6 1.08713950 14.63541807 22.26320376  
1 1.95014501 14.11790944 22.68584703  
6 0.46747551 15.66624847 22.97900986

1 0.85281924 15.94841186 23.96151461  
6 -1.11404370 15.96388899 21.17529736  
1 -1.97985504 16.47282649 20.74543026  
6 -0.49270696 14.93415230 20.46065973  
1 -0.87290376 14.64254834 19.48028579  
1 -1.12102570 17.14190180 22.99646744  
1 4.95208919 16.14118257 11.92166865  
1 0.31233977 4.90194025 24.88493753  
1 6.35211910 3.89833132 13.78570898

{Cu<sup>II</sup>(TPP<sup>4-</sup>)}<sup>2-</sup>, S = 1/2

charge=-2 mult=2

29 2.62316608 10.52096486 18.39742391  
7 2.89019046 8.50162239 18.72674071  
7 3.39067806 10.32227431 16.47879027  
6 4.53362223 15.44570420 12.60433790  
6 5.88484365 4.68066136 14.34535668  
6 3.74629005 11.36479131 15.63871346  
6 4.61213062 10.87630924 14.59458502  
1 5.07133994 11.47984198 13.81687893  
6 4.77797126 9.52514386 14.80343461  
1 5.41169531 8.84656024 14.23919047  
6 4.02067923 9.18575361 15.97937817  
6 4.01154253 7.89912422 16.57154498  
6 3.45938289 7.59171451 17.84210164  
6 3.37046587 6.26637308 18.38835445  
1 3.69617993 5.35262834 17.89934882  
6 2.75142575 6.37585088 19.61661866  
1 2.56038083 5.57420222 20.32354872  
6 2.44074920 7.76728004 19.81208200  
6 3.40637211 12.73656548 15.80658009  
6 3.79410738 13.66914474 14.72178618  
6 4.59487856 14.81577920 14.95621301  
1 4.94579427 15.00713268 15.97132509  
6 4.95375090 15.68571458 13.92216262  
1 5.58126381 16.55368975 14.14536185  
6 3.74724541 14.31057702 12.34700740  
1 3.40189934 14.10440387 11.32966856  
6 3.38676638 13.44382594 13.38252173  
1 2.76923892 12.56948431 13.16942218  
6 4.65403051 6.79473838 15.81206282  
6 4.25055256 6.47775856 14.49343021  
1 3.44517032 7.06015303 14.04283032  
6 4.85377529 5.44112830 13.77280610  
1 4.50853042 5.21848539 12.75916960  
6 6.30126155 4.98077901 15.65143051  
1 7.11200773 4.40869688 16.11145368  
6 5.69787237 6.01902696 16.36958493  
1 6.03521188 6.25173021 17.38080503  
7 2.35430284 12.53979327 18.06824756  
7 1.85740520 10.71655705 20.31762608  
6 0.60110951 5.56612079 24.12608759  
6 -0.53703617 16.37548030 22.50918635

6 1.48455581 9.67355142 21.15005647  
 6 0.62716936 10.16858249 22.19822626  
 1 0.15748724 9.56743384 22.97148627  
 6 0.48870780 11.52494658 22.00256283  
 1 -0.13247392 12.20998560 22.57293620  
 6 1.24782803 11.85956032 20.82645050  
 6 1.26665295 13.14823695 20.23878946  
 6 1.80054716 13.45260861 18.95993435  
 6 1.87902362 14.77604756 18.40760376  
 1 1.56204535 15.69141854 18.89924565  
 6 2.47364993 14.66232870 17.16775458  
 1 2.65015664 15.46172631 16.45460742  
 6 2.78381726 13.27081709 16.97241570  
 6 1.80630766 8.29885965 20.97278121  
 6 1.39228539 7.35967306 22.04208795  
 6 0.58050915 6.22651372 21.78190682  
 1 0.24160489 6.05269621 20.75952773  
 6 0.19609169 5.34832255 22.79964459  
 1 -0.43922325 4.49138819 22.55677534  
 6 1.39879999 6.68718161 24.40864956  
 1 1.73294038 6.87569304 25.43313214  
 6 1.78469544 7.56230344 23.38938268  
 1 2.41158777 8.42490209 23.62196634  
 6 0.64736187 14.25641439 21.01217411  
 6 1.07837547 14.56490669 22.32399041  
 1 1.88653085 13.97331121 22.75739185  
 6 0.49797161 15.60409218 23.05956129  
 1 0.86399385 15.81987433 24.06736808  
 6 -0.98113728 16.08334877 21.21047323  
 1 -1.79582856 16.66375514 20.76817977  
 6 -0.40071990 15.04232403 20.47744008  
 1 -0.75991375 14.81545504 19.47244775  
 1 -0.99013100 17.18833811 23.08227983  
 1 4.81437081 16.12556385 11.79619003  
 1 0.30059108 4.87968987 24.92147420  
 1 6.35584193 3.86993067 13.78380195

{Cu<sup>II</sup>(TPP<sup>4-</sup>)}<sup>2-</sup>, S = 3/2

charge=-2 mult=4

29 2.62130472 10.52042424 18.39636370  
 7 2.85301243 8.50704862 18.70500395  
 7 3.48180875 10.33498953 16.54422151  
 6 4.53594071 15.47184020 12.63740316  
 6 5.87615497 4.65569783 14.35258567  
 6 3.78674934 11.36968020 15.66449440  
 6 4.57844777 10.86448140 14.58108307  
 1 4.99532148 11.45942724 13.77426033  
 6 4.74495624 9.51140859 14.79400680  
 1 5.31909746 8.81640170 14.18902613  
 6 4.05357956 9.18510294 16.00698230  
 6 4.03751839 7.89160196 16.58612516  
 6 3.46678952 7.59651594 17.84925968  
 6 3.40991727 6.28349109 18.42196859

1 3.78873599 5.37636653 17.96166517  
6 2.78771181 6.39979284 19.64822541  
1 2.60169858 5.60834318 20.36742697  
6 2.42544428 7.77734321 19.81080514  
6 3.45236598 12.73716914 15.82931365  
6 3.82428171 13.67490716 14.74113387  
6 4.64366056 14.80592957 14.97677402  
1 5.01546080 14.97682682 15.98834470  
6 4.99033796 15.68776349 13.94778897  
1 5.63361232 16.54464024 14.16828487  
6 3.72683842 14.35342488 12.38064366  
1 3.35274419 14.17066738 11.36908993  
6 3.37820755 13.47529715 13.41174650  
1 2.74057037 12.61465499 13.20262269  
6 4.66703896 6.78444245 15.82476084  
6 4.25259318 6.46291421 14.50917313  
1 3.44474060 7.04534104 14.06292132  
6 4.84483033 5.42208192 13.78673958  
1 4.48895795 5.19795184 12.77692073  
6 6.30269898 4.95772100 15.65540336  
1 7.11406534 4.38283378 16.11128032  
6 5.71199896 6.00203258 16.37433463  
1 6.06155953 6.23581407 17.38127475  
7 2.38937145 12.53422322 18.08772981  
7 1.76098978 10.70479257 20.24848625  
6 0.61586237 5.54501840 24.10283964  
6 -0.53706290 16.39800052 22.49870701  
6 1.44303144 9.66872501 21.12211813  
6 0.65917598 10.17780760 22.20941008  
1 0.23547074 9.58387007 23.01338972  
6 0.51392340 11.53492310 22.00703444  
1 -0.04920232 12.23415978 22.61749426  
6 1.20651408 11.85902846 20.79412501  
6 1.23229333 13.15473154 20.22014946  
6 1.78805255 13.44735179 18.94978674  
6 1.83643868 14.75862217 18.37228640  
1 1.46499946 15.66738056 18.83527083  
6 2.43790762 14.63815352 17.13617249  
1 2.61154587 15.42738571 16.41149612  
6 2.79971643 13.26058292 16.97315002  
6 1.76314686 8.29882704 20.94996038  
6 1.37008502 7.35563364 22.02598642  
6 0.54056873 6.23657588 21.76978333  
1 0.17871830 6.08024075 20.75224326  
6 0.17318809 5.34779226 22.78542341  
1 -0.47716701 4.50056301 22.54906094  
6 1.43492475 6.65115184 24.37984617  
1 1.80043757 6.81888469 25.39712912  
6 1.80483453 7.53586244 23.36177812  
1 2.45027831 8.38665282 23.58676647  
6 0.62547572 14.26504434 20.99532760  
6 1.06282368 14.57325416 22.30672247  
1 1.86997221 13.97809812 22.73736314

|   |             |             |             |
|---|-------------|-------------|-------------|
| 6 | 0.49353969  | 15.61610100 | 23.04446502 |
| 1 | 0.86673017  | 15.82941250 | 24.05035867 |
| 6 | -0.98637072 | 16.10913181 | 21.20064331 |
| 1 | -1.79791165 | 16.69599649 | 20.76060360 |
| 6 | -0.41851787 | 15.06276916 | 20.46637708 |
| 1 | -0.78656010 | 14.83912294 | 19.46375856 |
| 1 | -0.98116424 | 17.21465316 | 23.07331048 |
| 1 | 4.80729809  | 16.16002293 | 11.83298302 |
| 1 | 0.32812373  | 4.85171964  | 24.89710763 |
| 1 | 6.33808352  | 3.84070970  | 13.78979198 |
